1 Bacterial strain-dependent dissociation of cell recruitment and cell-to-cell spread in early

2 *M. tuberculosis* infection

3

4 \*B. Shoshana Zha<sup>a,d</sup>, \*Ludovic Desvignes<sup>b</sup>, Tawania J. Fergus<sup>b</sup>, Amber Cornelius<sup>b</sup>, Tan-  
5 Yun Cheng<sup>c</sup>, D. Branch Moody<sup>c</sup>, and Joel D. Ernst<sup>d#</sup>

6 <sup>a</sup>Division of Pulmonary, Critical Care, Allergy and Sleep Medicine, Department of  
7 Medicine, University of California, San Francisco, California, USA

8 <sup>b</sup>Department of Medicine, New York University School of Medicine, New York, New  
9 York, USA

10 <sup>c</sup>Division of Rheumatology, Immunity and Inflammation, Department of Medicine,  
11 Brigham and Women's Hospital, Harvard Medical School, Boston, Massachusetts, USA

12 <sup>d</sup>Division of Experimental Medicine, Department of Medicine, University of California,  
13 San Francisco, California, USA

14 \*Co-first authors; the order was determined by the leadership role in writing the paper

15 **#Corresponding Author:** Joel Ernst, MD

16 1001 Potrero Ave, Room 601

17 UCSF Box 1234

18 joel.ernst@ucsf.edu

19

20 **Running title:** *M. tuberculosis* dissemination and T cell priming

21 **Keywords:** Mycobacterium tuberculosis, Innate Response, T cell priming, Beijing strain

22 Word Count, Abstract: 139

23 Word Count, Text: 4,242

24 Abbreviations

25 Early secretory antigenic target secretion system (ESX), Mediastinal lymph node  
26 (MdLN), Mononuclear phagocyte (MNP), Monocyte-derived dendritic cells (moDC),  
27 Monocyte-derived recruited macrophages (RM), *Mycobacterium tuberculosis* (*M.*  
28 *tuberculosis*), neutrophils (neut), Phthiocerol dimycocerosates (PDIM), Phenolic  
29 glycolipids (PGL)

30

31 **ABSTRACT**

32 In the initial stage of respiratory infection, *Mycobacterium tuberculosis* traverses from  
33 alveolar macrophages to phenotypically diverse monocyte-derived phagocytes and  
34 neutrophils in the lung parenchyma. Here, we compare the *in vivo* kinetics of early  
35 bacterial growth and cell-to-cell spread of two strains of *M. tuberculosis*: a lineage 2  
36 strain, 4334, and the widely studied lineage 4 strain H37Rv. Using flow cytometry, live  
37 cell sorting of phenotypic subsets, and quantitation of bacteria in cells of the distinct  
38 subsets, we found that 4334 induces less leukocyte influx into the lungs but  
39 demonstrates earlier population expansion and cell-to-cell spread. The earlier spread of  
40 4334 to recruited cells, including monocyte-derived dendritic cells, is accompanied by  
41 earlier and greater magnitude of CD4<sup>+</sup> T cell activation. The results provide evidence  
42 that strain-specific differences in interactions with lung leukocytes can shape adaptive  
43 immune responses *in vivo*.

44 **IMPORTANCE**

45 Tuberculosis is a leading infectious disease killer world-wide and is caused by  
46 *Mycobacterium tuberculosis*. After exposure to *M. tuberculosis*, outcomes range from

47 apparent elimination to active disease. Early innate immune responses may contribute  
48 to differences in outcomes, yet it is not known how bacterial strains alter the early  
49 dynamics of innate immune and T cell responses. We infected mice with distinct strains  
50 of *M. tuberculosis* and discovered striking differences in innate cellular recruitment, cell-  
51 to-cell spread of bacteria in the lungs, and kinetics of initiation of antigen-specific CD4 T  
52 cell responses. We also found that *M. tuberculosis* can spread beyond alveolar  
53 macrophages even before a large influx of inflammatory cells. These results provide  
54 evidence that distinct strains of *M. tuberculosis* can exhibit differential kinetics in cell-to-  
55 cell spread which is not directly linked to early recruitment of phagocytes but is  
56 subsequently linked to adaptive immune responses.

## 57 **INTRODUCTION**

58 *Mycobacterium tuberculosis* is a facultative intracellular bacterium that resides in  
59 tissue mononuclear phagocytes (MNP) and granulocytes (1, 2). Previous investigations  
60 have shown that *M. tuberculosis* first enters alveolar macrophages (3, 4). After  
61 replication in alveolar macrophages, the bacteria subsequently spread to multiple  
62 subsets of phagocytes in the lung parenchyma, largely recruited from circulating  
63 monocytes (5–7). Subsequently, monocyte-derived lung dendritic cells (moDC) acquire  
64 the bacteria and transport them to draining lymph nodes (2), where they transfer  
65 antigens to lymph node resident dendritic cells that prime antigen-specific T cells (8, 9).  
66 After proliferating and differentiating, effector T cells traffic to the lungs and arrest  
67 progression of the infection (10). *M. tuberculosis* antigen-specific T cell responses  
68 require 14-17 days to develop after aerosol infection of mice with the commonly-used  
69 H37Rv strain (2, 10), and an average of 6 weeks is required for development of

70 adaptive immune responses after infection in humans (11, 12). Considerable evidence  
71 indicates that the rate-limiting step in initiating *M. tuberculosis* antigen-specific CD4 T  
72 cell responses is acquisition of the bacteria by dendritic cells in the lung, and transport  
73 of live bacteria to local draining lymph nodes (8, 10, 13–16).

74 The mechanisms of cell-to-cell spread of *M. tuberculosis* are incompletely  
75 understood, although evidence suggests a role for necrosis of infected cells and release  
76 of viable bacteria that are subsequently ingested by other cells (17). Virulent strains of  
77 *M. tuberculosis* can inhibit apoptosis (18) through multiple mechanisms including  
78 upregulation of the antiapoptotic protein Mcl-1 (19), inhibition of NOX2-induced reactive  
79 oxygen species formation (20), upregulation of soluble TNF receptor 2 (21), and  
80 inhibition of apoptotic envelope stabilization (22), although induction of apoptosis still  
81 occurs and is important for control of *M. tuberculosis in vivo* (23). Conversely, virulent  
82 *M. tuberculosis* can promote necrosis through mitochondrial transmembrane potential  
83 disruption (24), depletion of host cellular NAD<sup>+</sup> (25), and inhibition of plasma membrane  
84 repair with induction of lipoxin A4 (17, 26), among other mechanisms.

85 The early secretory antigenic target secretion system (ESX)-1, a type VII  
86 secretion system encoded by the RD1 locus of *M. tuberculosis* (27, 28), is implicated in  
87 multiple mechanisms for its role in *M. tuberculosis* virulence (29–32). These  
88 mechanisms include recruitment of macrophages (33), activation of neutrophils (34),  
89 and secretion of immunodominant T cell antigens (ESAT-6 and CFP-10) (35–37). In  
90 addition, ESX-1 has been linked to induction of macrophage necrosis (38–40). ESX-1's  
91 role in cellular recruitment and induction of cell death leads to the hypothesis that it  
92 plays a key role in *M. tuberculosis* cell-to-cell transfer.

93           The majority of studies of early innate responses and bacterial cell-to-cell transfer  
94 focus on *M. tuberculosis* lineage 4 strains, especially H37Rv or Erdman. However, there  
95 are 6 other human-adapted lineages (41) which vary genetically, phenotypically, and  
96 degree of induction of inflammatory responses *in vitro* (42). Lineage 2, which includes  
97 the Beijing family, is thought to have enhanced pathogenicity (i.e. ability to cause  
98 disease) and less protection by BCG vaccination (43, 44). The Beijing family is defined  
99 by region of difference (RD) 105, and has 5 sublineages (45). Sublineage 207 has  
100 demonstrated increased pathogenicity in guinea pigs, and the strain 4334 within this  
101 sublineage was the source of more secondary cases of TB than any other in San  
102 Francisco, California (45).

103           Increasing evidence indicates that distinct *M. tuberculosis* strains exhibit  
104 differential interactions with innate immune responses, as reflected by differences in  
105 cytokine release (46, 47) and monocyte activation (48). The goal of this work was to  
106 characterize the kinetics of *M. tuberculosis* growth and cell-to-cell spread early in  
107 infection, to compare the results between two distinct strains of *M. tuberculosis*, and to  
108 assess the relationship of cell recruitment and bacterial spread to initiation of CD4 T cell  
109 responses. We found that H37Rv and 4334 differ in their recruitment of leukocytes to  
110 the lungs, spread from alveolar macrophages to other leukocytes, and the kinetics of  
111 antigen-specific CD4 T cell activation. Our work demonstrates strain dependent  
112 dissociation of inflammatory cell recruitment and bacterial cell-to-cell spread, and that  
113 the timing of cell-to-cell spread impacts the dynamics of antigen-specific CD4 T cell  
114 responses.

## 115 **RESULTS**

116 ***Differential early cell dynamics after aerosol infection with M. tuberculosis strains***  
117 ***H37Rv, 4334, and H37Rv $\Delta$ RD1.***

118 To test the hypothesis that distinct *M. tuberculosis* strains vary in their initial  
119 interactions with the host, we quantitated live bacteria in the lungs of mice infected with  
120 H37Rv, 4334, or H37Rv lacking the virulence locus RD1 (H37Rv $\Delta$ RD1) which encodes  
121 the ESX-1 type VII secretion system (27, 28) implicated in cell recruitment and  
122 inflammation (29, 30, 33, 37). Mice were infected via aerosol with 200-300 colony  
123 forming units (CFU) of each bacterial strain and analyzed at frequent time points 1-14  
124 days post-infection, a short time frame that is known to be prior to development of  
125 detectable T cell responses. H37Rv exhibited a lag of approximately 72h in which the  
126 number of bacteria did not increase in the lungs, similar to that reported in other studies  
127 (49, 50). In contrast, strain 4334 grew without a similar lag, and exhibited an increase in  
128 the lung bacterial burden that was already detectable by day 3 (Fig. 1A). After day 6, the  
129 populations of both strains expanded steadily during the first 2 weeks of infection and  
130 were equivalent by day 10 post-infection. In contrast to the two ESX-1-replete strains,  
131 H37Rv $\Delta$ RD1 experienced a prolonged lag in expansion (28). The three strains also  
132 differed in their induction of increased lung cellularity: H37Rv induced the most marked  
133 increases in cellularity; 4334 responses were intermediate; and H37Rv $\Delta$ RD1 induced  
134 no detectable changes in the number of lung cells in the initial 14 days of infection (Fig.  
135 1B).

136 We next compared and characterized the cell populations in the lungs during the  
137 first two weeks of infection with the three *M. tuberculosis* strains. For this, we used  
138 established cell phenotypic markers and flow cytometry to differentiate subsets in the

139 CD45<sup>+</sup> cell population: CD11b<sup>neg/lo</sup>CD11c<sup>pos</sup> alveolar macrophages; CD11b<sup>pos</sup>CD11c<sup>pos</sup>  
140 which includes moDC; Gr-1<sup>hi</sup>CD11c<sup>neg</sup> neutrophils; Gr-1<sup>int</sup>CD11c<sup>neg</sup> monocytes; and Gr-  
141 1<sup>neg</sup>CD11c<sup>neg</sup> monocyte-derived recruited macrophages (RM) (Fig. S1) (6). As shown in  
142 Figure 2A, CD11b<sup>neg/lo</sup>CD11c<sup>pos</sup> alveolar macrophages and CD11b<sup>pos</sup>CD11c<sup>pos</sup> moDC  
143 varied little during the first two weeks and did not differ in lungs of mice infected with  
144 4334 or H37Rv. While Gr-1<sup>hi</sup>CD11c<sup>neg</sup> neutrophils did not increase in the lungs during  
145 the first two weeks of infection with any strain, numbers were consistently lower in the  
146 lungs of mice infected with 4334 and H37Rv $\Delta$ RD1 than with H37Rv. The most striking  
147 difference between strains was in Gr-1<sup>int</sup>CD11c<sup>neg</sup> monocytes and Gr-1<sup>neg</sup>CD11c<sup>neg</sup> RM.  
148 As previously reported (2), mice infected with H37Rv showed a progressive increase in  
149 Gr-1<sup>int</sup>CD11c<sup>neg</sup> monocytes and Gr-1<sup>neg</sup>CD11c<sup>neg</sup> RM in the lungs over the first two  
150 weeks, while neither population increased significantly in lungs of mice infected with  
151 4334 or H37Rv $\Delta$ RD1. These findings indicate that the initial cellular inflammatory  
152 response to infection with virulent *M. tuberculosis* varies considerably when distinct  
153 bacterial strains infect genetically homogeneous hosts.

154 ***Mycobacterium tuberculosis strain-dependent dynamics of spread to recruited***  
155 ***lung cells.***

156 To compare the spread of H37Rv and 4334 from alveolar macrophages to  
157 recruited inflammatory cells during the initial phase of infection, we used BSL3-  
158 contained flow cytometry sorting of live cells belonging to the previously-identified lung  
159 leukocyte subsets (2, 5, 8). We sorted the individual cell populations from infected lungs  
160 at frequent intervals and plated the resulting sorted cell fractions on solid media for  
161 bacterial quantitation. Consistent with recently-published results generated by flow

162 cytometry detection of cells that harbored fluorescent protein-expressing *M. tuberculosis*  
163 (3, 4), we found live bacteria exclusively in alveolar macrophages for the first days post-  
164 infection (Fig. 2B, Fig. S2B). On day 6 post-infection, live *M. tuberculosis* were  
165 detectable in Gr-1<sup>hi</sup>CD11c<sup>neg</sup> neutrophils in 2 of the 10 mice infected with strain 4334,  
166 but in none of the 15 mice infected with H37Rv, and the average number of live bacteria  
167 per cell remained higher in 4334 compared to H37Rv over time (Fig. S2A). Similarly, on  
168 day 8 post-infection, 2 of the 10 mice in the group infected with 4334 and none of the 15  
169 infected with H37Rv had detectable live *M. tuberculosis* in Gr-1<sup>int</sup>CD11c<sup>neg</sup> monocytes,  
170 again with higher average number of live bacteria per cell until day 14. Within  
171 CD11b<sup>pos</sup>CD11c<sup>pos</sup> moDC, a significantly higher number of live *M. tuberculosis* were  
172 detected for strain 4334 than H37Rv at 8 days post-infection, but the average number of  
173 live bacteria per cell in 4334 was higher than H37Rv only until day 10. In Gr-  
174 1<sup>neg</sup>CD11c<sup>neg</sup> RM, the number of live *M. tuberculosis* per cell was not significantly  
175 different between the two strains, although the number of live bacteria per cell was  
176 slightly (but not statistically significantly) higher in 4334 than H37Rv at days 10 and 14  
177 post infection.

178 H37Rv $\Delta$ RD1 expanded in alveolar macrophages at a rate similar to wild-type  
179 H37Rv between days 1 and 10. H37Rv $\Delta$ RD1 also spread to CD11b<sup>pos</sup>CD11c<sup>pos</sup> moDC  
180 and Gr-1<sup>hi</sup>CD11c<sup>neg</sup> neutrophils in quantities comparable to that of wild-type H37Rv by  
181 day 10. However, H37Rv $\Delta$ RD1 did not expand further between days 10 and 14. Of  
182 note, live H37Rv $\Delta$ RD1 was recoverable in only 2 out of 5 mice in Gr-1<sup>int</sup>CD11c<sup>neg</sup>  
183 monocytes at day 14, and one mouse out of 5 at day 8 in Gr-1<sup>neg</sup>CD11c<sup>neg</sup> RM.



184 One known difference with functional importance between *M. tuberculosis*  
185 isolates is the presence or absence of phenolic glycolipids (PGL), which are cell wall  
186 lipids that modulate virulence (51). PGLs have been implicated in macrophage  
187 recruitment (52), dendritic cell uptake, and reduction in inflammatory pathways (53).  
188 PGLs are absent from H37Rv and many clinical isolates but are expressed in HN878, a  
189 prototypical strain used to study the Beijing family. As 4334 is a member of the Beijing  
190 family (44), we determined if 4334 has PGLs. Using electrospray ionization-quadrupole  
191 time-of-flight-mass spectrometry (ESI-QTOF-MS), there was no detectable PGL in  
192 either 4334 and H37Rv (Fig. 3A,B) under conditions in which PGL was detected in  
193 HN878, and the structurally related long chain polyketide phthiocerol dimycocerosates  
194 (PDIM) was ionized and detected. This result excludes PGL production as the cause of  
195 differential cell-to-cell transfer in these two strains.

196 ***Mycobacterium tuberculosis* 4334 is associated with less alveolar macrophage**  
197 **death than H37Rv.**

198 Considering the absence of a lag and immediate expansion of 4334 in alveolar  
199 macrophages *in vivo*, we examined the intracellular growth dynamics of 4334 and  
200 H37Rv. We infected *ex vivo* murine alveolar macrophages with 4334 or H37Rv at an  
201 MOI of 1, and quantitated CFU at 48 and 72h post-infection. In cultured alveolar  
202 macrophages, H37Rv did not expand compared with the input by 48h but expanded  
203 approximately 5-fold by 72h. In contrast, 4334 expanded 4-fold by 48h, and nearly 10-  
204 fold by 72h (Fig. 4A). These growth kinetics mimic the initial phase of infection *in vivo*, in  
205 which there was a delay in growth of H37Rv for the first 3 days while 4334 expanded  
206 without a similar lag (Fig. 1B).

207 To determine if the apparent difference in growth of 4334 and H37Rv in alveolar  
208 macrophages was due to differential cell death, we quantitated infection, early  
209 apoptosis, and late cell death 48h post-infection. Using *M. tuberculosis* strains  
210 expressing DsRed fluorescent protein and flow cytometry, we observed a higher  
211 frequency of infection in cultured alveolar macrophages by 4334 than H37Rv (Fig.  
212 4B,C), consistent with the results obtained by CFU plating. We used a viability marker  
213 (Zombie Aqua, ZA) and a phosphatidylserine-binding marker (Annexin V, AV) to  
214 quantitate the viability of alveolar macrophages infected *ex vivo* (Fig. 4B). In this  
215 scheme, ZA<sup>-</sup>/AV<sup>-</sup> cells are viable, ZA<sup>-</sup>/AV<sup>+</sup> cells are considered apoptotic, ZA<sup>+</sup>/AV<sup>-</sup> are  
216 necrotic, and ZA<sup>+</sup>/AV<sup>+</sup> represent late death, regardless of the mode of death (54). We  
217 found significantly less cell death in alveolar macrophages infected by either strain  
218 compared to uninfected controls, with quantitatively lower rates of cell death with 4334  
219 compared to H37Rv. Moreover, infection with strain 4334 was associated with a lower  
220 frequency of apoptotic cells than H37Rv (Fig. 4D). There was no significant difference in  
221 apoptosis or late death between the two strains in bystander cells (that are defined as  
222 cells in the same well but lacking DsRed-expressing bacteria).

223 Cell-to-cell spread of *M. tuberculosis* is thought to involve bacteria released by  
224 dying cells. However, our results indicate that 4334 spreads more efficiently despite  
225 being associated with lower rates of death of alveolar macrophages. We therefore  
226 sought alternative explanations for the early spread of 4334. Since the ESX-1 type VII  
227 secretion system has also been implicated in cell-to-cell spread of *M. tuberculosis*, we  
228 used liquid chromatography-mass spectrometry (LC-MS/MS) to analyze culture filtrate  
229 (i.e. secreted) proteins of 4334 and H37Rv. This revealed significantly higher levels of 3

230 ESX-1 substrates (EspA, EspB, EspF) and relative higher levels of 3 additional  
231 substrates (EspC, ESAT-6, CFP-10) in culture filtrates of 4334 compared with H37Rv  
232 (Fig. S3). In contrast, proteins secreted by non-ESX mechanisms (Ag85B and Ag85C)  
233 did not differ between the two strains. The finding that cell-to-cell spread of *M.*  
234 *tuberculosis* is associated with quantitative ESX-1 activity and not with the frequency of  
235 cell death suggests an alternative mechanism of cell-cell spread and dissemination of  
236 *M. tuberculosis* independent of cell death.

237 ***Mycobacterium tuberculosis strain-dependent dynamics of antigen-specific CD4***  
238 ***T cell priming.***

239 *M. tuberculosis* induction of antigen-specific CD4 T cell responses requires  
240 transport of live bacteria by migratory moDC from the lungs to the mediastinal draining  
241 lymph node (8, 10, 13). Since we found more live bacteria in CD11b<sup>pos</sup>CD11c<sup>pos</sup> moDC  
242 from mice infected with 4334 than H37Rv as early as day 8 post-infection (Fig. 2B), we  
243 hypothesized that this could result in earlier antigen-specific CD4 T cell priming in the  
244 lung-draining lymph node. We first quantitated live bacteria in the mediastinal lymph  
245 node (MdLN) on day 14 post-infection, corresponding to the onset of antigen-specific  
246 CD4 T cell priming (10). This revealed approximately 3-fold more 4334 than H37Rv in  
247 the lymph node (Fig 5A). We have previously established that a threshold number of  
248 bacteria are required in the MdLN for priming of *M. tuberculosis* antigen-specific CD4 T  
249 cells (10), and therefore hypothesized that 4334 might activate an earlier CD4 T cell  
250 response than H37Rv. To test this, we adoptively transferred *M. tuberculosis* Ag85B-  
251 specific TCR transgenic (P25TCR-Tg) naïve CD4 T cells (labeled with CellTrace Violet)  
252 into mice 24h prior to aerosol infection. Examination of the adoptively transferred T cells

253 isolated from the MdLN revealed no proliferation at day 10 post-infection in mice  
254 infected with either strain. In contrast, by day 14 post-infection, P25TCR-Tg CD4 T cells  
255 had proliferated and expanded in mediastinal lymph nodes of mice infected with strain  
256 4334 but not H37Rv (Fig. 5B-C). At day 17, P25TCR-Tg CD4 T cells had also  
257 proliferated in mice infected with H37Rv, although at significantly lower frequency than  
258 in mice infected with 4334.

259 IFN $\gamma$  is essential for control of *M. tuberculosis* (55, 56). Therefore, we analyzed  
260 both total IFN $\gamma$  concentrations and CD4 T cell specific IFN $\gamma$  production in the lungs of  
261 infected mice of both strains. We found total IFN $\gamma$  concentrations in lung homogenate  
262 supernatants to be significantly higher in mice infected with 4334 than H37Rv at day 14  
263 post-infection (Fig. S4A). We next quantitated IFN $\gamma$ -producing T cells in the lungs (Fig.  
264 S4B) and found that both endogenous and P25TCR-Tg IFN $\gamma$ -producing T cells were  
265 more abundant in mice infected with 4334 than H37Rv at day 14 post-infection, though  
266 the difference was not statistically significant. By day 17 post-infection, P25TCR-Tg but  
267 not endogenous, IFN $\gamma$ -producing T cells were significantly more abundant in mice  
268 infected with 4334 than H37Rv (Fig. 5D). Together, these results indicate that *M.*  
269 *tuberculosis* strain 4334 spreads to moDC and initiates antigen-specific CD4 T cell  
270 responses earlier than does strain H37Rv. This earlier spread to dendritic cells and T  
271 cell priming happens despite strain 4334 inducing fewer inflammatory cells to the lung  
272 early in infection, and is associated with accelerated priming of antigen-specific CD4 T  
273 cells.

274 We investigated whether the more robust and earlier T cell response correlated  
275 into superior long-term control of infection. Indeed, at 7 weeks post-infection, we found

276 a half-log reduction in CFU recovery from the lungs of mice infected with *M. tuberculosis*  
277 strain 4334 versus H37Rv (Fig. S5A). Interestingly, while total cell numbers in the lungs  
278 of mice infected with *M. tuberculosis* strain 4334 were significantly lower than H37Rv  
279 infected mice (Fig. 2B), by 7 weeks this was reversed (Fig. S5B), and the total number  
280 of lymphocytes appears to account for the difference in cellularity (Fig. S5D). The  
281 increased cellularity also correlates with more granuloma-like lesions in the lungs of  
282 mice infected with 4334 (Fig. S5C, S5E), resembling the pathologic findings reported in  
283 guinea pigs (44).

## 284 **DISCUSSION**

285 The early host responses to pulmonary infection with *M. tuberculosis* are  
286 beginning to be clarified (3, 4), although studies to date have not examined the potential  
287 impact of bacterial strain diversity. We analyzed early cellular responses in mice  
288 infected by aerosol with 4334, a lineage 2 strain (44), and compared this to responses  
289 to H37Rv, from lineage 4. Using flow sorting of live lung cells, we compared cell  
290 populations, bacterial growth, and bacterial spread from alveolar macrophages to  
291 recruited cells in the first 2 weeks of infection. We found that 4334 induces less  
292 inflammatory cell recruitment than H37Rv, resembling that of H37Rv lacking the RD1  
293 locus. However, 4334 spreads beyond alveolar macrophages earlier and is present in  
294 greater abundance in monocytes, neutrophils, and moDC. This results in earlier  
295 trafficking of bacteria to the mediastinal lymph node, and in turn, is accompanied by  
296 earlier and greater magnitude activation of Ag85B-specific CD4 T cells.

297 Recent studies have confirmed that alveolar macrophages are the first cells  
298 infected in the lungs by *M. tuberculosis*, a fact that had long been speculated (6) but

299 only recently demonstrated (3, 4). Alveolar macrophages are initially permissive to *M.*  
300 *tuberculosis* replication (4), likely through their inability to mount a large inflammatory  
301 response while leading to the upregulation of self-preserving Nrf2 pathways (4) and lipid  
302 metabolism (57). We did not find a difference in total CD11b<sup>neg/lo</sup>CD11c<sup>hi</sup> alveolar  
303 macrophages cell numbers after infection. However, there is an earlier expansion of  
304 4334 with significantly higher CFU 8 days post-infection than in H37Rv infected mice,  
305 due to a lag in initial H37Rv growth *in vivo* (49, 50). Since alveolar macrophages were  
306 the only infected cells during this initial phase, we hypothesized that the differential  
307 expansion of the two strains could be due to differences in intracellular replication in  
308 alveolar macrophages. We confirmed that 4334 replicates at a higher rate than H37Rv  
309 in cultured alveolar macrophages, and this is accompanied by a lower rate of cell death.

310 By 2 weeks after infection, alveolar macrophages have been found to translocate  
311 from the alveolar space to the lung interstitium (3), providing the opportunity for spread  
312 of *M. tuberculosis* to other cells. Extending our previous work as well as that of others  
313 (3–5, 8), we observed spread of both H37Rv and 4334 to monocyte-derived dendritic  
314 cells and macrophages. Here, we found differential spread to the CD11b<sup>pos</sup>CD11c<sup>pos</sup>  
315 population, with 4334 appearing in this population at a higher rate than H37Rv 8 days  
316 post-infection. Notably, this cell population includes moDC (5, 6), and although a small  
317 percentage of alveolar macrophages also express CD11b (58, 59) with potential  
318 upregulation during inflammation and infection (3, 60), those cells have not been found  
319 to migrate to lymphoid tissues. Nonetheless, with the combined findings of an earlier  
320 and higher rate of spread to neutrophils and monocyte-derived cells in mice infected  
321 with 4334 versus H37Rv, our data implies greater spread of 4334 from alveolar

322 macrophages to recruited cells in spite of inducing recruitment of fewer inflammatory  
323 cells than H37Rv.

324         The determinants and mechanisms of *M. tuberculosis* cell-to-cell spread are not  
325 well understood, especially *in vivo*, but likely depend on multiple factors including host  
326 cell recruitment, intracellular bacterial growth, cellular release, and survival in  
327 extracellular spaces. In this work, we found that while 4334, a lineage 2 strain with  
328 increased pathogenicity in guinea pigs (44) and the ability to induce higher levels of type  
329 I interferons (61), recruits significantly fewer monocytes and cells that differentiated from  
330 monocytes but demonstrates superior growth and/or survival rates in the cells it does  
331 infect compared to H37Rv. This suggests that progression of infection is not solely  
332 determined by cellular recruitment but also by the rates of intracellular replication and  
333 transfer between host cells. Differential growth dynamics between *M. tuberculosis*  
334 strains has been shown in multiple primary cell types, including human monocytes (62),  
335 human monocyte-derived macrophages (63), and murine bone marrow-derived  
336 macrophages (64). We hypothesize that the permissiveness of alveolar macrophages  
337 for *M. tuberculosis* growth in the initial stage of infection (4, 57) maximizes the  
338 intracellular growth variations between strains.

339         Multiple mechanisms can determine the intracellular survival and growth of *M.*  
340 *tuberculosis*. We focused on differential host cell death since this is thought to play a  
341 key role in cell-to-cell spread. Death-receptor induced apoptosis (23) and subsequent  
342 efferocytosis (65) are key host mechanisms for control of *M. tuberculosis*. As opposed  
343 to avirulent strains lacking the operon RD1 and thus functional ESX-1 machinery,  
344 virulent strains of *M. tuberculosis* have been found to inhibit apoptosis (18) and promote

345 necrosis (66) through multiple mechanisms. Necrosis is hypothesized to be the major  
346 mode of host cell death for bacterial cell-cell spread, as it allows release of bacilli into  
347 the extracellular space for phagocytosis by permissive host cells, rather than being  
348 contained in apoptotic vesicles and killed through efferocytosis (17, 33, 67, 68). In  
349 contrast to that model, we found that 4334 sustains alveolar macrophage *ex vivo*  
350 survival to a greater extent than does H37Rv, yet 4334 spreads more readily to other  
351 cells in the lungs.

352 ESX-1 is implicated in the induction of cell death through the action of secreted  
353 proteins including ESAT-6 (40), which is concentration dependent. We have shown that  
354 4334 secretes higher levels of ESX-1 substrates compared to H37Rv, but this is not  
355 correlated with activation of cell death of infected alveolar macrophages *ex vivo*. One  
356 hypothesis of these discordant findings is the limitation of using *ex vivo* infection  
357 modeling, however, the significant protection of alveolar macrophage viability in 4334-  
358 infected cells over H37Rv-infected cells argues against differential induction of cell  
359 death as a means of cell-to-cell spread. Rather, these results are compatible with a  
360 model in which nonlytic release contributes to cell-to-cell spread of *M. tuberculosis* in  
361 the lungs (70). Nonlytic release has been demonstrated in *Dictyostelium* amoebae,  
362 where *M. marinum* and *M. tuberculosis* egress via ejection rather than lysis of the  
363 amoebae (71), and *in vivo* in zebrafish where nonlytic cell-to-cell transfer of *M. marinum*  
364 has been observed (72). Furthermore, *M. tuberculosis* can grow extracellularly (73, 74),  
365 adding an additional possibility that 4334 survives extracellularly more effectively than  
366 H37Rv, allowing uptake by diverse phagocytic cells. Teasing these differentials is of  
367 essential importance to understand the mechanism of tuberculosis cell spread.



368 We also found significantly more live 4334 *M. tuberculosis* than H37Rv in the  
369 draining mediastinal lymph node 14 days post-infection. This correlates with the timing  
370 and speed of 4334 spread to moDC, which transport *M. tuberculosis* to the draining  
371 mediastinal lymph node (2, 9). Of note, we focused on CD11b<sup>pos</sup>CD11c<sup>pos</sup> DCs in this  
372 study. During homeostasis, conventional DCs (cDCs) have been classified into two  
373 populations in mice: cDC-1 (CD26<sup>+</sup>CD11c<sup>+</sup>CD103<sup>+</sup>CD11b<sup>-</sup>) and cDC-2  
374 (CD26<sup>+</sup>CD11b<sup>+</sup>CD11c<sup>+</sup>CD172a<sup>+</sup>) (75, 76). cDC-1 have been characterized as inducing  
375 CD8 T cell activation (77) while cDC-2 are implicated in CD4 T cell activation (78). In  
376 previous work, we found that cells resembling cDC-2 carry live *M. tuberculosis* to the  
377 draining mediastinal lymph node (2, 5), and cDC-1 do not appear to be significantly  
378 infected by *M. tuberculosis* in the first two weeks of infection (4). We have previously  
379 shown cDC-2-like cells are derived from monocytes (5), and therefore have termed this  
380 population moDC. However, CD11b<sup>pos</sup>CD11c<sup>pos</sup> migratory DCs do not prime CD4 T  
381 cells efficiently during *M. tuberculosis* infection (9), and we and others have previously  
382 demonstrated that infected moDC transfer antigen to resident mediastinal lymph node  
383 DC that in turn activate T cells (8, 9). Here, we observe a significant increase of T cell  
384 activation at 17 days post-infection in mice infected with 4334 which correlates with a  
385 higher bacterial burden in the draining lymph node at day 14 post-infection. These  
386 findings are consistent with the finding of earlier spread of the bacteria to  
387 CD11b<sup>pos</sup>CD11c<sup>pos</sup> moDC in the lungs, but do not indicate whether the greater  
388 magnitude of Ag85B-specific CD4 T cell activation in the lymph node is the  
389 consequence of more moDC presenting antigen, or more antigen presented per moDC.

390 Earlier T cell activation can lead to superior control of *M. tuberculosis* infection  
391 (13). Here, we demonstrate that 4334 induces an earlier antigen-specific T cell  
392 response which is associated with a reduction in CFU 7 weeks post-infection compared  
393 to H37Rv infected mice. In addition, the quantitatively greater accumulation of  
394 lymphocytes in the lungs of mice infected with 4334 is associated with an increased  
395 number of inflammatory lesions in the lung at this time point.

396 A limitation of this work is the resolution of the flow sorting strategy. As the work  
397 prioritized identification and characterization of the cell populations that harbor live *M.*  
398 *tuberculosis* in the initial days after infection when the bacterial burdens are low, the  
399 number of surface markers used for sorting and the resolution of certain cell subsets  
400 was limited. Nevertheless, the resolution of the subsets was sufficient to allow tracking  
401 of the spread of *M. tuberculosis* from alveolar macrophages to recruited inflammatory  
402 cells over time. An additional limitation is that the genetic and molecular differences  
403 between H37Rv and 4334 were not identified, although we do rule out the lineage 2  
404 specific virulence lipid, PGL, as one potential difference. While both strains were  
405 isolated from patients with pulmonary TB, H37Rv was initially isolated in 1905 (79), and  
406 4334 was isolated in the mid-2000s (44). It is not known whether or how passage and  
407 storage of the two strains has resulted in genotypic or phenotypic differences from the  
408 original patient isolates. However, we do rule out the lineage 2 specific virulence lipid,  
409 PGL, and comparative genetic analysis of these strains, as well as future work on the  
410 recognized differences between lineage 2 and 4 strains can now be considered in light  
411 of these detailed findings during early in vivo infection.

412 In conclusion, we found that *M. tuberculosis* strain-dependent differences in the  
413 rate of spread from alveolar macrophages to recruited leukocytes in the lungs is  
414 associated with lower rates of alveolar macrophage death and with a lower rate and  
415 extent of initial leukocyte recruitment to the lungs. The finding that enhanced spread  
416 from alveolar macrophages is associated with lower rates of alveolar macrophage cell  
417 death suggests that nonlytic mechanisms are likely to contribute to cell-to-cell spread of  
418 *M. tuberculosis* in vivo. The data also reveal that the strains examined differ in their  
419 ESX-1- (type VII) but not SecA (type I)-mediated protein secretion activity, which  
420 correlates with enhanced spread, suggesting that Esx-1 may contribute to nonlytic  
421 spread of *M. tuberculosis* in the early stages of infection in the lungs. Understanding the  
422 mechanisms underlying these findings will provide further insights into the virulence of  
423 *M. tuberculosis*.

## 424 **METHODS**

### 425 **Mice and Care**

426 C57BL/6 mice were purchased from the Jackson Laboratory. P25 TCR Tg mice  
427 whose CD4 T cells recognize peptide 25 (aa 240-254) of *M. tuberculosis* antigen 85B in  
428 complex with mouse MHC II I-A<sup>b</sup> (10, 80) were crossed in-house with congenic CD45.1<sup>+</sup>  
429 (B6.SJL-Ptprc<sup>a</sup> Pepc<sup>b</sup>/BoyJ) and with Rag1<sup>-/-</sup> mice. For infections with *M. tuberculosis*,  
430 mice were housed under barrier conditions in the ABSL-3 facility at the NYU School of  
431 Medicine. All mice were between 8 and 12 weeks of age at the beginning of the  
432 experiment, and mice of both sexes were used. Mice were euthanized by CO<sub>2</sub>  
433 asphyxiation followed by cervical dislocation. All experiments were performed with the  
434 prior approval of the NYU Institutional Animal Care and Use Committee (IACUC).

## 435 **Cell isolation for *in vitro* and *in vivo* experiments**

436 Alveolar macrophages (AM) were harvested by bronchoalveolar lavage (81), and  
437 purity confirmed through flow cytometry analysis with CD11c<sup>+</sup>CD11b<sup>-</sup> cells (2) above  
438 90% and autofluorescence (82). AM were cultured for up to 4 days in RPMI 1640 with  
439 10% heat-inactivated FBS, 2mM L-glutamine, 1mM sodium pyruvate, 1x  $\beta$ -  
440 mercaptoethanol (Gibco), 10 mM HEPES, 10ng/mL of recombinant murine granulocyte-  
441 macrophage colony-stimulating factor (Peprotech), and 10 U/ml penicillin – 10  $\mu$ g/ml  
442 streptomycin that was washed out prior to infection.

443 P25 TCR Tg CD4 T cells were isolated from the secondary lymphoid organs of  
444 P25TCR-Tg/CD45.1/Rag1<sup>-/-</sup> mice by magnetic cell sorting using anti-CD4 conjugated  
445 microbeads and an AutoMACS Classic sorter (Miltenyi Biotec), according to the  
446 manufacturer's recommendations.

## 447 ***Mycobacterium tuberculosis* strains, growth, and infections**

448 *M. tuberculosis* H37Rv was grown as previously described (83). 4334 was  
449 obtained and maintained as previously described (61). Mice were infected via the  
450 aerosol route, using an inhalation exposure system (Glas-Col) (2). The infectious dose  
451 was quantitated on day 1 by plating whole lung homogenates from 3–5 mice on  
452 Middlebrook 7H11 agar. To determine the bacterial load throughout the infection, lungs  
453 were harvested, homogenized, and serial dilutions were plated on Middlebrook 7H11  
454 agar. Colony Forming Units (CFUs) were counted after incubation of plates at 37°C for  
455 3 weeks.

456 For *in vitro* infections, mycobacteria were grown to mid-log phase, pelleted at  
457 3750 g, resuspended in PBS + 0.5% Tween 80, re-pelleted and excess Tween 80

458 washed off by centrifugation in PBS. The final pellet was re-suspended in RPMI 1640  
459 with 10% serum, the bacterial density was evaluated by measuring absorbance at 580  
460 nm, and the multiplicity of infection was adjusted to the mammalian cell density.

#### 461 **Flow cytometry and cell sorting**

462 Lungs were removed and processed into single-cell suspensions for flow  
463 cytometry and cell sorting as previously described (2, 84). Antibodies conjugated to  
464 various fluorophores and directed against surface markers were:

| <b>Antibody</b>    | <b>Clone</b> | <b>Source</b>  |
|--------------------|--------------|----------------|
| B220-PE            | RA3-6B2      | BioLegend      |
| CD4-BUV395         | RM4-5        | BD Biosciences |
| CD4-APC/Cy7        | RM4-5        | BioLegend      |
| CD8-APC            | 53-6.7       | BioLegend      |
| CD8-BV421          | 53-6.7       | BioLegend      |
| CD11c-PerCP        | HL3          | BioLegend      |
| CD11b-APC/Cy7      | M1/70        | BD Biosciences |
| CD19-FITC          | 6D5          | BioLegend      |
| CD45-PE            | 30-F11       | BD Biosciences |
| CD45-FITC          | 30-F11       | BD Biosciences |
| CD45.1-AF700       | A20          | BioLegend      |
| CD45.2-PerCp/Cy5.5 | 104          | BD Biosciences |
| CD45.2-FITC        | 104          | BD Biosciences |
| CD90.2-PerCP/Cy5.5 | 30-H12       | BioLegend      |
| Gr-1-APC           | RB6-8C5      | BD Biosciences |
| Ly6C-FITC          | AL-21        | BD Biosciences |
| Ly6G-AF647         | 1A8          | BioLegend      |
| Siglec-F-PE        | E50-2440     | BD Biosciences |

465 For flow cytometry analysis, stained samples were fixed overnight in 1%  
466 paraformaldehyde. A minimum of 200,000 events per sample, gated on single cells  
467 using forward and side scatter parameters, were acquired using an LSRII and  
468 FACSDiva software (BD Biosciences).

469 For live cell sorting, fluorescently labeled live cells were acquired using a BSL3-  
470 contained iCyt/Sony Synergy cell sorter. Cells were first separated in non-hematopoietic

471 cells (CD45<sup>-</sup>), AM (CD45<sup>+</sup>CD11b<sup>-</sup>CD11c<sup>+</sup>), monocyte-derived dendritic cells (moDC,  
472 CD45<sup>+</sup>CD11b<sup>+</sup>CD11c<sup>+</sup>) and other myeloid cells (CD45<sup>+</sup>CD11b<sup>+</sup>CD11c<sup>neg/low</sup>). Then, this  
473 latter fraction was re-acquired and sorted into neutrophils (Neut, Gr1<sup>hi</sup>CD11c<sup>-</sup>),  
474 monocytes (Gr1<sup>int</sup>CD11c<sup>-</sup>) and recruited macrophages (Gr-1<sup>-</sup>CD11c<sup>low</sup>). All cell fractions  
475 were collected and plated for CFU recovery and quantitation on agar as described  
476 above. For flow cytometry and cell sorting, acquisition data were analyzed using FlowJo  
477 software (TreeStar).

#### 478 ***Mycobacterium tuberculosis*-antigen specific T cell adoptive transfer,** 479 **proliferation, and IFN $\gamma$ stimulation**

480 P25TCR-Tg/CD45.1/Rag1<sup>-/-</sup> CD4<sup>+</sup> T cells were stained with CellTrace Violet  
481 (ThermoFisher Scientific), according to the manufacturer's recommendations. Cells  
482 were re-suspended at 2-3x10<sup>6</sup> cells/100  $\mu$ l in sterile PBS for intravenous injection via  
483 the retro-orbital route into anesthetized CD45.2<sup>+</sup> C57BL/6 recipient mice. Recipient mice  
484 were infected with aerosolized *M. tuberculosis* 24h post-T cell transfer. T cell  
485 proliferation was assessed at selected time points post-infection by quantitating  
486 CellTrace Violet dilution by flow cytometry. Whole lung supernatants were analyzed for  
487 IFN $\gamma$  levels by ELISA.

#### 488 **Quantification of Necrotic and Apoptotic Cells**

489 AM were infected with *M. tuberculosis* expressing DsRed for designated times,  
490 after which cells were washed and then lifted with cold PBS containing 0.5 mM EDTA.  
491 Cells were fixed, washed, and stained with Stain Zombie Aqua (Biolegend) to quantify  
492 necrosis and AnnexinV-APC to quantify apoptosis (BD Biosciences) per manufacturer

493 protocols, washed with PBS, and analyzed by flow cytometry for DsRed (bacteria),  
494 Annexin V, and Zombie Aqua.

#### 495 **Analysis of PDIM and PGL**

496 Bacterial strains were grown shaking at 37°C for ~7 days to an OD580 of 0.6 in  
497 Middlebrook 7H9 broth supplemented with 10% Oleic acid/dextrose/catalase and 0.05%  
498 Tween 80. Cultures were centrifuged, supernatant removed, and pellets washed twice,  
499 resuspended in 1mL of CH<sub>3</sub>OH and contacted with 25mL CHCl<sub>3</sub>/CH<sub>3</sub>OH (2:1) overnight.  
500 Lipid was then extracted, dissolved in CHCl<sub>3</sub>:CH<sub>3</sub>OH at 1mg/mL, and ran on an Agilent  
501 Technologies 6520 Accurate-Mass Q-ToF and 1200 series HPLC as previously  
502 described (85).

#### 503 **ESX-1 Secretion Assay**

504 Bacterial strains were grown shaking at 37°C for ~7 days in Middlebrook 7H9  
505 broth supplemented with 10% Oleic acid/dextrose/catalase and 0.05% Tween 80 to an  
506 OD580 0.4 – 0.7. Cultures were centrifuged, washed thrice in Sauton's media (0.5 g  
507 KH<sub>2</sub>PO<sub>4</sub>, 0.5 g MgSO<sub>4</sub>, 4.0 g L-asparagine, 60 ml glycerol, 0.05 g Ferric ammonium  
508 citrate, 2.0 g citric acid, 0.1 ml 1% ZnSO<sub>4</sub>, dH<sub>2</sub>O to 900 ml, 2.5 ml 20% Tween-80), and  
509 incubated for an additional 24 hours. Bacteria were centrifuged at 2500 g for 10 min,  
510 and supernatants passed through 0.2 µm syringe filters to obtain filtrates. Samples were  
511 reconstituted in 200µL of 2M urea, reduced with DTT at 57°C for 1h, alkylated with 0.5M  
512 iodacetamide for 45 min at RT, followed by trypsin digestion and cleansed as previously  
513 described (86). After SpeedVac concentration, samples reconstituted in 0.5% acetic  
514 acid, and loaded onto an Acclaim PepMap trap column in line with an EASY Spray  
515 50cm x 75µm ID PepMap C18 analytical HPLC column with 2µm bead size using the

516 auto sampler of an EASY-nLC 1000 HPLC (ThermoFisher) and solvent A (2%  
517 acetonitrile, 0.5% acetic acid). The peptides were gradient eluted into a Q Exactive  
518 (Thermo Scientific) mass spectrometer using a 2h linear gradient from 2% to 40%  
519 solvent B (95% acetonitrile, 0.5% acetic acid), followed by 10 min from 40% to 100%  
520 solvent B. Solvent B was held at 100% for another 10 min for column wash. Spectra  
521 were acquired using the following parameters: resolution of 70,000, an automatic gain  
522 control of 1e6, with a maximum ion time of 120 ms, and scan range of 300 to 1500 m/z.  
523 Following each full MS scan twenty data-dependent high resolution HCD MS/MS  
524 spectra were acquired. All MS/MS spectra were collected using the following  
525 instrument parameters: resolution of 17,500, AGC target of 2e5, maximum ion time of  
526 250 ms, one microscan, 2 m/z isolation window, fixed first mass of 150 m/z, and  
527 normalized collision energy of 27.

528 All acquired MS/MS spectra were searched against a combined database for  
529 H37Rv and NITR203 on UniProt, using Andromeda search algorithm and MaxQuant for  
530 quantitation (87). The data set was filtered to remove proteins with only one unique  
531 peptide and that were not detected in all three replicates of at least one strain. LFQ  
532 intensity values were  $\log_2$  transformed. A two-sided t-test and correcting for multiple  
533 testing by controlling for FDR at 5% using Benjamini-Hochberg's method. In addition, z-  
534 scores were calculated and used to perform hierarchical clustering.

### 535 **Histopathology**

536 The left lung was excised, fixed in 10% buffered formalin for one week at room  
537 temperature, then embedded in paraffin. 5  $\mu\text{m}$  sections were cut and stained with  
538 hematoxylin and eosin. Whole lung sections were scanned at 40X by the NYU School of



539 Medicine Experimental Pathology Research Laboratory, using a Leica SCN400 F  
540 whole-slide scanner. Digital images were used for the quantitation of lung  
541 histopathology using the open-source image processing software Fiji, with two  
542 independent approaches. Briefly, the total surface area of the lung section was  
543 calculated, then the contributions of airways and blood vessels to that area were  
544 subtracted, leaving the contribution of the structural tissues. The proportion of  
545 inflammatory infiltrates within those tissues was then quantitated, either by manual  
546 contouring or using automated color density contouring. For each 40X section, the final  
547 percentage of lung inflammatory infiltrate was calculated as the average of the values  
548 obtained by each method.

#### 549 **Statistical analysis**

550 Experiments were performed at least twice, with exception of experiments  
551 focusing on H37Rv $\Delta$ RD1 and 7 weeks post-infection which were performed once.  
552 Results are expressed as mean and standard deviation (SD). Unless otherwise stated,  
553 parametric Student two-tailed t test and Holm multiple comparisons correction, with a  
554 95% confidence interval was used to compare experimental groups, with  $p < 0.05$   
555 considered significant.

#### 556 **ACKNOWLEDGMENTS**

557 We thank Diane Ordway and Midori Kato-Maeda for the *M. tuberculosis* strain  
558 4334. Cynthia Portal-Celhay and Thais Klevorn aided in experiments. We acknowledge  
559 the expertise and support of Beatrix Ueberheide and Jessica Chapman-Lim at the NYU  
560 Proteomics Laboratory, supported in part by NYU Langone Health and the Laura and  
561 Isaac Perlmutter Cancer Center Support Grant P30CA016087 from the National Cancer

562 Institute, for proteomics assays. Cell sorting and flow cytometry were performed by  
563 Michael Gregory from the NYU Cytometry and Cell Sorting Laboratory, which is  
564 supported in part by grant P30CA016087 from the National Institutes of Health/National  
565 Cancer Institute.

566 This project was supported by NIH grants R01 AI051242 and R01 AI049313, as  
567 well as an award from the Stony Wold-Herbert Fund.

568 L.D. and J.D.E. designed the experiments, B.S.Z, L.D., and J.D.E. analyzed the  
569 results; T.J.F., L.D., and A.C. conducted experiments; T.Y and D.B.M. provided the  
570 lipidomic analysis and reviewed the manuscript; B.S.Z, L.D., and J.D.E. wrote the  
571 manuscript.

572

## 573 REFERENCES

- 574 1. Sabin FR, Doan CA. 1927. The relation of monocytes and clasmatoocytes to early  
575 infection in rabbits with bovine tubercle bacilli. *J Exp Med* 46:627–644.
- 576 2. Wolf AJ, Linas B, Trevejo-Nuñez GJ, Kincaid E, Tamura T, Takatsu K, Ernst JD.  
577 2007. *Mycobacterium tuberculosis* infects dendritic cells with high frequency and  
578 impairs their function in vivo. *J Immunol* 179:2509–2519.
- 579 3. Cohen SB, Gern BH, Delahaye JL, Adams KN, Plumlee CR, Winkler JK, Sherman  
580 DR, Gerner MY, Urdahl KB. 2018. Alveolar macrophages provide an early  
581 *Mycobacterium tuberculosis* niche and initiate dissemination. *Cell Host Microbe*  
582 24:439–446.
- 583 4. Rothchild AC, Olson GS, Nemeth J, Amon LM, Mai D, Gold ES, Diercks AH,  
584 Aderem A. 2019. Alveolar Macrophages Generate a Noncanonical NRF2-Driven

- 585           Transcriptional Response to Mycobacterium tuberculosis in vivo. *Sci Immunol*  
586           4:eaaw6693.
- 587   5.   Norris BA, Ernst JD. 2018. Mononuclear cell dynamics in *M. tuberculosis* infection  
588       provide opportunities for therapeutic intervention. *PLoS Pathog* 14:e1007154.
- 589   6.   Srivastava S, Ernst JD, Desvignes L. 2014. Beyond macrophages: The diversity  
590       of mononuclear cells in tuberculosis. *Immunol Rev* 262:179–192.
- 591   7.   Skold M, Behar SM, Sköld M, Behar SM. 2014. Tuberculosis triggers a tissue-  
592       dependent program of differentiation and acquisition of effector functions by  
593       circulating monocytes. *J Immunol* 181:6349–6360.
- 594   8.   Srivastava S, Ernst JD. 2014. Cell-to-cell transfer of *M. tuberculosis* antigens  
595       optimizes CD4 T cell priming. *Cell Host Microbe* 15:741–752.
- 596   9.   Samstein M, Schreiber HA, Leiner IM, Sušac B, Glickman MS, Pamer EG. 2013.  
597       Essential yet limited role for CCR2+ inflammatory monocytes during  
598       Mycobacterium tuberculosis-specific T cell priming. *Elife* 2:e01086.
- 599   10.   Wolf AJ, Desvignes L, Linas B, Banaiee N, Tamura T, Takatsu K, Ernst JD. 2008.  
600       Initiation of the adaptive immune response to Mycobacterium tuberculosis  
601       depends on antigen production in the local lymph node, not the lungs. *J Exp Med*  
602       205:105–115.
- 603   11.   Poulsen A. 1950. Some clinical features of Tuberculosis. *Acta Tuberc Scand*  
604       24:311–346.
- 605   12.   Wallgren A. 1948. A time-table of Tuberculosis. *Tubercle* 29:245–251.
- 606   13.   Chackerian AA, Alt JM, Perera T V, Dascher CC, Behar SM. 2002. Dissemination  
607       of Mycobacterium tuberculosis is influenced by host factors and precedes the

- 608 initiation of T-cell immunity. *Infect Immun* 70:4501–4509.
- 609 14. Blomgran R, Ernst JD. 2011. Lung neutrophils facilitate activation of naïve  
610 antigen-specific CD4<sup>+</sup> T cells during *Mycobacterium tuberculosis* infection. *J*  
611 *Immunol* 186:7110–7119.
- 612 15. Blomgran R, Desvignes L, Briken V, Ernst JD. 2012. *Mycobacterium tuberculosis*  
613 inhibits neutrophil apoptosis, leading to delayed activation of naïve CD4 T cells.  
614 *Cell Host Microbe* 11:81–90.
- 615 16. Grace PS, Ernst JD. 2015. Suboptimal antigen presentation contributes to  
616 virulence of *Mycobacterium tuberculosis* in vivo. *J Immunol* 196:357–364.
- 617 17. Divangahi M, Chen M, Gan H, Desjardins D, Hickman TT, Lee DM, Fortune S,  
618 Behar SM, Remold HG. 2009. *Mycobacterium tuberculosis* evades macrophage  
619 defenses by inhibiting plasma membrane repair. *Nat Immunol* 10:899–906.
- 620 18. Keane J, Remold HG, Kornfeld H. 2000. Virulent *Mycobacterium tuberculosis*  
621 Strains Evade Apoptosis of Infected Alveolar Macrophages. *J Immunol* 164:2016–  
622 2020.
- 623 19. Sly LM, Hingley-Wilson SM, Reiner NE, McMaster WR. 2003. Survival of  
624 *Mycobacterium tuberculosis* in host macrophages involves resistance to  
625 apoptosis dependent upon induction of antiapoptotic Bcl-2 family member Mcl-1. *J*  
626 *Immunol* 170:430–437.
- 627 20. Briken V, Miller JL. 2008. Living on the edge: Inhibition of host cell apoptosis by  
628 *Mycobacterium tuberculosis*. *Future Microbiol* 3:415–422.
- 629 21. Remold M Katarzyna Balcewicz-Sablinska HG, Keane J. 1998. Pathogenic  
630 *Mycobacterium tuberculosis* evades apoptosis of host macrophages by release of

- 631 TNF-R2, resulting in inactivation of TNF- $\alpha$ . *J Immunol* 161:2636–2641.
- 632 22. Gan H, Lee J, Ren F, Chen M, Kornfeld H, Remold HG. 2008. Mycobacterium  
633 tuberculosis blocks crosslinking of annexin-1 and apoptotic envelope formation on  
634 infected macrophages to maintain virulence. *Nat Immunol* 9:1189–1197.
- 635 23. Stutz MD, Allison CC, Ojaimi S, Preston SP, Doerflinger M, Arandjelovic P,  
636 Whitehead L, Bader SM, Batey D, Asselin-Labat M-L, Herold MJ, Strasser A,  
637 West NP, Pellegrini M. 2021. Macrophage and neutrophil death programs  
638 differentially confer resistance to tuberculosis. *Immunity* 54:1758–1771.
- 639 24. Chen M, Gan H, Remold HG. 2006. A mechanism of virulence: Virulent  
640 Mycobacterium tuberculosis strain H37Rv, but not attenuated H37Ra, causes  
641 significant mitochondrial inner membrane disruption in macrophages leading to  
642 necrosis. *J Immunol* 176:3707–3716.
- 643 25. Sun J, Siroy A, Lokareddy RK, Speer A, Doornbos KS, Cingolani G, Niederweis  
644 M. 2015. The tuberculosis necrotizing toxin kills macrophages by hydrolyzing  
645 NAD. *Nat Struct Mol Biol* 22:672–678.
- 646 26. Chen M, Divangahi M, Gan H, Shin DSJ, Hong S, Lee DM, Serhan CN, Behar  
647 SM, Remold HG. 2008. Lipid mediators in innate immunity against tuberculosis:  
648 Opposing roles of PGE 2 and LXA 4 in the induction of macrophage death. *J Exp*  
649 *Med* 205:2791–2801.
- 650 27. Stanley SA, Raghavan S, Hwang WW, Cox JS. 2003. Acute infection and  
651 macrophage subversion by Mycobacterium tuberculosis require a specialized  
652 secretion system. *PNAS* 100:13001–13006.
- 653 28. Pym AS, Brodin P, Brosch R, Huerre M, Cole ST. 2002. Loss of RD1 contributed

- 654 to the attenuation of the live tuberculosis vaccines *Mycobacterium bovis* BCG and  
655 *Mycobacterium microti*. *Mol Microbiol* 46:709–717.
- 656 29. Koo IC, Wang C, Raghavan S, Morisaki JH, Cox JS, Brown EJ. 2008. ESX-1-  
657 dependent cytolysis in lysosome secretion and inflammasome activation during  
658 mycobacterial infection. *Cell Microbiol* 10:1866–1878.
- 659 30. Mishra BB, Moura-Alves P, Sonawane A, Hacoheh N, Griffiths G, Moita LF, Anes  
660 E, Moura-Alves P, Sonawane A, Hacoheh N, Griffiths G, Moita LF, Anes E. 2010.  
661 *Mycobacterium tuberculosis* protein ESAT-6 is a potent activator of the  
662 NLRP3/ASC inflammasome. *Cell Microbiol* 12:1046–1063.
- 663 31. Wassermann R, Gulen MF, Sala C, Perin SG, Lou Y, Rybniker J, Schmid-Burgk  
664 JL, Schmidt T, Hornung V, Cole ST, Ablasser A. 2015. *Mycobacterium*  
665 *tuberculosis* differentially activates cGAS- and inflammasome-dependent  
666 intracellular immune responses through ESX-1. *Cell Host Microbe* 17:799–810.
- 667 32. Conrad WH, Osman MM, Shanahan JK, Chu F, Takaki KK, Cameron J,  
668 Hopkinson-Woolley D, Brosch R, Ramakrishnan L. 2017. Mycobacterial ESX-1  
669 secretion system mediates host cell lysis through bacterium contact-dependent  
670 gross membrane disruptions. *PNAS* 114:1371–1376.
- 671 33. Davis JM, Ramakrishnan L. 2009. The role of the granuloma in expansion and  
672 dissemination of early Tuberculous infection. *Cell* 136:37–49.
- 673 34. Welin A, Björnsdóttir H, Winther M, Christenson K, Oprea T, Karlsson A, Forsman  
674 H, Dahlgren C, Bylund J. 2015. CFP-10 from *Mycobacterium tuberculosis*  
675 selectively activates human neutrophils through a pertussis toxin-sensitive  
676 chemotactic receptor. *Infect Immun* 83:205–213.

- 677 35. Brandt L, Oettinger T, Holm A, Andersen AB, Anderson P, Andersen P. 1996. Key  
678 epitopes on the ESAT-6 antigen recognized in mice during the recall of protective  
679 immunity to *Mycobacterium tuberculosis*. *J Immunol* 157:3527–33.
- 680 36. Elhay MJ, Oettinger T, Andersen P. 1998. Delayed-type hypersensitivity  
681 responses to ESAT-6 and MPT64 from *Mycobacterium tuberculosis* in the guinea  
682 pig. *Infect Immun* 66:3454–3456.
- 683 37. Ravn P, Demissie A, Eguale T, Wondwosson H, Lein D, Amoudy HA, Mustafa  
684 AS, Kok Jensen A, Holm A, Rosenkrands I, Oftung F, Olobo J, von Reyn F,  
685 Andersen P. 1999. Human T cell responses to the ESAT-6 antigen from  
686 *Mycobacterium tuberculosis*. *J Infect Dis* 179:637–645.
- 687 38. Wong KW, Jacobs WR. 2011. Critical role for NLRP3 in necrotic death triggered  
688 by *Mycobacterium tuberculosis*. *Cell Microbiol* 13:1371–1384.
- 689 39. Dallenga T, Repnik U, Corleis B, Eich J, Reimer R, Griffiths GW, Schaible UE.  
690 2017. *M. tuberculosis*-induced necrosis of infected neutrophils promotes bacterial  
691 growth following phagocytosis by macrophages. *Cell Host Microbe* 22:519–530.
- 692 40. Francis RJ, Butler RE, Stewart GR. 2014. *Mycobacterium tuberculosis* ESAT-6 is  
693 a leukocidin causing Ca<sup>2+</sup> influx, necrosis and neutrophil extracellular trap  
694 formation. *Cell Death Dis* 5:e1474.
- 695 41. Brites D, Gagneux S. 2017. The nature and evolution of genomic diversity in the  
696 *Mycobacterium tuberculosis* complex. *Adv Exp Med Biol* 1019:1–26.
- 697 42. Coscolla M, Gagneux S. 2014. Consequences of genomic diversity in  
698 *Mycobacterium tuberculosis*. *Semin Immunol* 26:431–444.
- 699 43. Kremer K, Van Der Werf MJ, Au BKY, Anh DD, Kam KM, Van Doorn HR,

- 700 Borgdorff MW, Van Soolingen D. 2009. Vaccine-induced immunity by typical  
701 *Mycobacterium tuberculosis* Beijing strains. *Emerg Infect Dis* 15:335–339.
- 702 44. Kato-Maeda M, Shanley CA, Ackart D, Jarlsberg LG, Shang S, Obregon-Henao  
703 A, Harton M, Basaraba RJ, Henao-Tamayo M, Barrozo JC, Rose J, Kawamura  
704 LM, Coscolla M, Fofanov VY, Koshinsky H, Gagneux S, Hopewell PC, Ordway  
705 DJ, Orme IM. 2012. Beijing sublineages of *Mycobacterium tuberculosis* differ in  
706 pathogenicity in the guinea pig. *Clin Vaccine Immunol* 19:1222–1227.
- 707 45. Kato-Maeda M, Kim EY, Flores L, Jarlsberg LG, Osmond D, Hopewell PC. 2010.  
708 Differences among sublineages of the East-Asian lineage of *Mycobacterium*  
709 *tuberculosis* in genotypic clustering. *Int J Tuberc Lung Dis* 14:538–544.
- 710 46. Reiling N, Homolka S, Walter K, Brandenburg J, Niwinski L, Ernst M, Herzmann  
711 C, Lange C, Diel R, Ehlers S, Niemann S. 2013. Clade-specific virulence patterns  
712 of *Mycobacterium tuberculosis* complex strains in human primary macrophages  
713 and aerogenically infected mice. *MBio* 4:e00250-13.
- 714 47. Portevin D, Gagneux S, Comas I, Young D. 2011. Human macrophage responses  
715 to clinical isolates from the *Mycobacterium tuberculosis* complex discriminate  
716 between ancient and modern lineages. *PLoS Pathog* 7:e1001307.
- 717 48. Manca C, Reed MB, Freeman S, Mathema B, Kreiswirth B, Barry CE, Kaplan G.  
718 2004. Differential monocyte activation underlies strain-specific *Mycobacterium*  
719 *tuberculosis* pathogenesis. *Infect Immun* 72:5511–5514.
- 720 49. Dietrich J, Roy S, Rosenkrands I, Lindenstrøm T, Filskov J, Rasmussen EM,  
721 Cassidy J, Andersen P. 2015. Differential influence of nutrient-starved  
722 *Mycobacterium tuberculosis* on adaptive immunity results in progressive



- 723 tuberculosis disease and pathology. *Infect Immun* 83:4731–4739.
- 724 50. Valdés I, Montoro E, Mata-Espinoza D, Asín O, Barrios-Payan J, Francisco-Cruz  
725 A, Valdivia JA, Hernández-Pando R. 2014. Immunogenicity and protection  
726 conferred by *Mycobacterium habana* in a murine model of pulmonary  
727 tuberculosis. *Tuberculosis* 94:65–72.
- 728 51. Ly A, Liu J. 2020. Mycobacterial virulence factors: Surface-exposed lipids and  
729 secreted proteins. *Int J Mol Sci* 21:3985.
- 730 52. Cambier CJ, Takaki KK, Larson RP, Hernandez RE, Tobin DM, Urdahl KB,  
731 Cosma CL, Ramakrishnan L. 2014. Mycobacteria manipulate macrophage  
732 recruitment through coordinated use of membrane lipids. *Nature* 505:218–222.
- 733 53. Tabouret G, Astarie-Dequeker C, Demangel C, Malaga W, Constant P, Ray A,  
734 Honoré N, Bello NF, Perez E, Daffé M, Guilhot C. 2010. *Mycobacterium leprae*  
735 Phenoglycolipid-1 Expressed by Engineered *M. bovis* BCG modulates early  
736 interaction with human phagocytes. *PLoS Pathog* 6:e1001159.
- 737 54. Telford WG. 2018. Multiparametric analysis of apoptosis by flow cytometry, p.  
738 167–202. *In* *Methods in Molecular Biology*. Humana Press Inc.
- 739 55. Flynn JL, Chan J, Triebold KJ, Dalton DK, Stewart TA, Bloom BR. 1993. An  
740 essential role for Interferon- $\gamma$  in resistance to *Mycobacterium tuberculosis*  
741 infection. *J Exp Med* 173:2249–54.
- 742 56. Cooper AM, Dalton DK, Stewart TA, Griffin JP, Russell DG, Orme IM. 1993.  
743 Disseminated Tuberculosis in Interferon  $\gamma$  gene-disrupted mice. *J Exp Med*  
744 178:2243–2247.
- 745 57. Huang L, Nazarova E V, Tan S, Liu Y, Russell DG. 2018. Growth of

- 746           Mycobacterium tuberculosis in vivo segregates with host macrophage metabolism  
747           and ontogeny. *J Exp Med* 215:1135–1152.
- 748 58. Guth AM, Janssen WJ, Bosio CM, Crouch EC, Henson PM, Dow SW. 2009. Lung  
749           environment determines unique phenotype of alveolar macrophages. *Am J*  
750           *Physiol Lung Cell Mol Physiol* 296:936–946.
- 751 59. Lafuse WP, Rajaram MVS, Wu Q, Moliva JI, Torrelles JB, Turner J, Schlesinger  
752           LS. 2019. Identification of an Increased Alveolar Macrophage Subpopulation in  
753           Old Mice That Displays Unique Inflammatory Characteristics and Is Permissive to  
754           Mycobacterium tuberculosis Infection . *J Immunol* 203:2252–2264.
- 755 60. Duan M, Steinfort DP, Smallwood D, Hew M, Chen W, Ernst M, Irving LB,  
756           Anderson GP, Hibbs ML. 2016. CD11b immunophenotyping identifies  
757           inflammatory profiles in the mouse and human lungs. *Mucosal Immunol* 9:550–  
758           563.
- 759 61. Wiens KE, Ernst JD. 2016. The mechanism for Type I Interferon induction by  
760           Mycobacterium tuberculosis is bacterial strain-dependent. *PLoS Pathog*  
761           12:e1005809.
- 762 62. Li Q, Whalen CC, Albert JM, Larkin R, Zukowski L, Cave MD, Silver RF. 2002.  
763           Differences in rate and variability of intracellular growth of a panel of  
764           Mycobacterium tuberculosis clinical isolates within a human monocyte model.  
765           *Infect Immun* 70:6489–6493.
- 766 63. Wu S, Howard ST, Lakey DL, Kipnis A, Samten B, Safi H, Gruppo V, Wizel B,  
767           Shams H, Basaraba RJ, Orme IM, Barnes PF. 2004. The principal sigma factor  
768           sigA mediates enhanced growth of Mycobacterium tuberculosis in vivo. *Mol*

- 769 Microbiol 51:1551–1562.
- 770 64. Park JS, Tamayo MH, Gonzalez-Juarrero M, Orme IM, Ordway DJ. 2006. Virulent  
771 clinical isolates of *Mycobacterium tuberculosis* grow rapidly and induce cellular  
772 necrosis but minimal apoptosis in murine macrophages. *J Leukoc Biol* 79:80–86.
- 773 65. Martin CJ, Booty MG, Rosebrock TR, Nunes-Alves C, Desjardins DM, Keren I,  
774 Fortune SM, Remold HG, Behar SM. 2012. Efferocytosis is an innate antibacterial  
775 mechanism. *Cell Host Microbe* 12:289–300.
- 776 66. Michelet X, Tuli A, Gan H, Geadas C, Sharma M, Remold HG, Brenner MB. 2018.  
777 Lysosome-mediated plasma membrane repair is dependent on the small GTPase  
778 Arl8b and determines cell death type in *Mycobacterium tuberculosis* infection. *J*  
779 *Immunol* 200:3160–3169.
- 780 67. Mohareer K, Asalla S, Banerjee S. 2018. Cell death at the cross roads of host-  
781 pathogen interaction in *Mycobacterium tuberculosis* infection. *Tuberculosis*  
782 113:99–121.
- 783 68. Behar SM, Divangahi M, Remold HG. 2010. Evasion of innate immunity by  
784 mycobacterium tuberculosis: Is death an exit strategy? *Nat Rev Microbiol* 8:668–  
785 674.
- 786 69. Keane J, Remold HG, Kornfeld H. 2000. Virulent *Mycobacterium tuberculosis*  
787 Strains Evade Apoptosis of Infected Alveolar Macrophages. *J Immunol* 164:2016–  
788 2020.
- 789 70. Byrd TF, Green GM, Fowlston SE, Lyons CR. 1998. Differential growth  
790 characteristics and streptomycin susceptibility of virulent and avirulent  
791 *Mycobacterium tuberculosis* strains in a novel fibroblast-mycobacterium

- 792 microcolony assay. *Infect Immun* 66:5132–5139.
- 793 71. Hagedorn M, Ronde KH, Russell DG, Soldati T. 2009. Infection by tubercular  
794 mycobacteria is spread by nonlytic ejection from their amoeba hosts. *Science*  
795 323:1729–1733.
- 796 72. Cambier CJ, O’Leary SM, O’Sullivan MP, Keane J, Ramakrishnan L. 2017.  
797 Phenolic glycolipid facilitates mycobacterial escape from microbicidal tissue-  
798 resident macrophages. *Immunity* 47:552–565.
- 799 73. Woodruff CE. 1934. A free growth period of tubercle bacilli in the guinea pig  
800 omentum as related to the hypersensitive state. *Am J Pathol* 10:739–756.
- 801 74. Rich A. 1944. *The Pathogenesis of Tuberculosis*, 1st ed. Charles C. Thomas,  
802 Springfield, IL.
- 803 75. Bosteels C, Scott CL. 2020. Transcriptional regulation of DC fate specification.  
804 *Mol Immunol* 121:38–46.
- 805 76. Guilliams M, Ginhoux F, Jakubzick C, Naik SH, Onai N, Schraml BU, Segura E,  
806 Tussiwand R, Yona S. 2014. Dendritic cells, monocytes and macrophages: A  
807 unified nomenclature based on ontogeny. *Nat Rev Immunol* 14:571–578.
- 808 77. Ng SL, Teo YJ, Setiagani YA, Karjalainen K, Ruedl C. 2018. Type 1 conventional  
809 CD103+ dendritic cells control effector CD8+ T cell migration, survival, and  
810 memory responses during influenza infection. *Front Immunol* 9:3043.
- 811 78. Dudziak D, Kamphorst AO, Heidkamp GF, Buchholz VR, Trumfheller C,  
812 Yamazaki S, Cheong C, Liu K, Lee H-W, Park CG, Steinman RM, Nussenzweig  
813 MC. 2007. Differential antigen processing by dendritic cell subsets in vivo.  
814 *Science* 315:107–111.

- 815 79. Steenken W, Gardner LU. 1946. HISTORY OF H37 STRAIN OF TUBERCLE  
816 BACILLUS1. *Am Rev Tuberc* 54:62–66.
- 817 80. Tamura T, Ariga H, Kinashi T, Uehara S, Kikuchi T, Nakada M, Tokunaga T, Xu  
818 W, Kariyone A, Saito T, Kitamura T, Maxwell G, Takaki S, Takatsu K. 2004. The  
819 role of antigenic peptide in CD4+ T helper phenotype development in a T cell  
820 receptor transgenic model. *Int Immunol* 16:1691–1699.
- 821 81. Rothchild A, Mai D, Aderem A, Diercks A. 2020. Flow cytometry analysis and  
822 fluorescence-activated cell sorting of myeloid cells from lung and bronchoalveolar  
823 lavage samples from *Mycobacterium tuberculosis*-infected mice. *Bio Protoc*  
824 10:e3630.
- 825 82. Havenith CEG, Breedijk AJ, van Miert PPMC, Blijleven N, Calame W, Beelen  
826 RHJ, Hoefsmit ECM. 1993. Separation of alveolar macrophages and dendritic  
827 cells via autofluorescence: phenotypical and functional characterization. *J Leukoc*  
828 *Biol* 53:504–510.
- 829 83. Banaiee N, Jacobs WR, Ernst JD. 2006. Regulation of *Mycobacterium*  
830 *tuberculosis* whiB3 in the mouse lung and macrophages. *Infect Immun* 74:6449–  
831 6457.
- 832 84. Srivastava S, Grace PS, Ernst JD. 2016. Antigen export reduces antigen  
833 presentation and limits T cell control of *M. tuberculosis*. *Cell Host Microbe* 19:44–  
834 54.
- 835 85. Layre E, Sweet L, Hong S, Madigan CA, Desjardins D, Young DC, Cheng TY,  
836 Annand JW, Kim K, Shamputa IC, McConnell MJ, Debono CA, Behar SM,  
837 Minnaard AJ, Murray M, Barry CE, Matsunaga I, Moody DB. 2011. A comparative

- 838 lipidomics platform for chemotaxonomic analysis of mycobacterium tuberculosis.  
839 Chem Biol 18:1537–1549.
- 840 86. Safavi-Hemami H, Gajewiak J, Karanth S, Robinson SD, Ueberheide B, Douglass  
841 AD, Schlegel A, Imperial JS, Watkins M, Bandyopadhyay PK, Yandell M, Li Q,  
842 Purcell AW, Norton RS, Ellgaard L, Olivera BM. 2015. Specialized insulin is used  
843 for chemical warfare by fish-hunting cone snails. PNAS USA 112:1743–1748.
- 844 87. Rgen Cox J, Hein MY, Lubner CA, Paron I, Nagaraj N, Mann M. 2014. Accurate  
845 proteome-wide label-free quantification by delayed normalization and maximal  
846 peptide ratio extraction, termed MaxLFQ. Mol Cell Proteomics 13:2513–2526.

847

## 848 **Figure Legends**

849 **Figure 1. *M. tuberculosis* 4334 grows more rapidly but induces less cell**  
850 **recruitment than H37Rv in early infection.** C57BL/6 mice were infected by aerosol  
851 with 200-300 Colony Forming Units (CFU) of *M. tuberculosis* H37Rv, H37Rv $\Delta$ RD1  
852 ( $\Delta$ RD1), or 4334. Lungs were harvested at day 1, 3, 6, 8, 10, and 14 post-infection, and  
853 processed to single cell suspensions. **(A)** Total CFU isolated from the lungs of mice  
854 infected with the individual strains during the first 14 days of infection. **(B)** Total number  
855 of cells isolated from the lungs of mice infected with the individual strains. Results are  
856 shown as mean  $\pm$  SD in 1( $\Delta$ RD1), 2 (4334), and 6 (H37Rv) pooled experiments, with  
857 n=5 mice per strain per day in each experiment. Statistical significance was assessed  
858 by multiple unpaired T-test for each day and Holm-Sidak multiple comparisons  
859 correction, with a 95% confidence interval and \*p<0.05, \*\*p<0.01, \*\*\*p<0.001,

860 \*\*\*\* $p < 0.0001$ . For clarity, asterisks above H37Rv and 4334 are comparing only these 2  
861 strains, and below are  $\Delta$ RD1 compared to H37Rv.

862 **Figure 2. Differential strain-dependent spread of *M. tuberculosis* from**  
863 **CD11b<sup>neg/lo</sup>CD11c<sup>pos</sup> alveolar macrophages to recruited lung myeloid cells.** Mice  
864 were infected and lungs harvested as in Figure 1. (A) Cells were stained and analyzed  
865 by flow cytometry for quantitation of CD11b<sup>neg/lo</sup>CD11c<sup>pos</sup> alveolar macrophages,  
866 CD11b<sup>pos</sup>CD11c<sup>pos</sup> monocyte-derived dendritic cells, Gr-1<sup>hi</sup>CD11c<sup>neg</sup> neutrophils, Gr-  
867 1<sup>int</sup>CD11c<sup>neg</sup> monocytes, and Gr-1<sup>neg</sup>CD11c<sup>neg</sup> monocyte-derived recruited macrophages  
868 in the lungs (see Supplementary Figure 1 and Material and Methods for gating  
869 strategy). (B) Total CFU in each leukocyte subset after live flow cytometry sorting and  
870 plating of sorted cell populations on 7H11 solid media. Results are shown as mean  $\pm$   
871 SD in 1 ( $\Delta$ RD1), 2 (4334), and 6 (H37Rv) and pooled experiments, with  $n=5$  mice per  
872 strain per day in each experiment. Statistically significant difference between strains  
873 was assessed multiple unpaired T-test for each day and Holm-Sidak multiple  
874 comparisons correction, with a 95% confidence interval and \* $p < 0.05$ , \*\* $p < 0.01$ ,  
875 \*\*\* $p < 0.001$ , \*\*\*\* $p < 0.0001$ . For clarity, asterisks above H37Rv and 4334 are comparing  
876 only these 2 strains, and below are  $\Delta$ RD1 compared to H37Rv.

877 **Figure 3. *M. tuberculosis* strains 4334 and H37Rv do not produce PGL.** PGL and  
878 PDIM analysis of *M. tuberculosis* H37Rv, HN878, and 4334 in 7H9 cultures, using  
879 electrospray ionization-quadrupole time-of-flight-mass spectrometry (ESI-QTOF-MS).  
880 Shown are representative images of (A) extracted ion chromatograms of PGL

881 [C114H212O18+NH4]<sup>+</sup> at *m/z* 1887.601 and PDIM [C91H180O5+NH4]<sup>+</sup> at *m/z*  
882 1371.417, and (B) mass spectra. Strain HN878 was included in the analysis as a known  
883 PGL producing positive control.

884 **Figure 4. *M. tuberculosis* strain 4334 replicates to a greater extent than H37Rv in**  
885 **alveolar macrophages. (A)** Cultured alveolar macrophages were infected for 48 or 72h  
886 with an MOI of 1 with *M. tuberculosis* H37Rv or 4334. Results are shown as mean CFU  
887 fold-increase over initial inoculum. (B) Representative flow cytometry analysis of  
888 cultured alveolar macrophages infected *in vitro* for 48h with *M. tuberculosis* H37Rv or  
889 4334, each expressing DsRed fluorescent protein and stained with markers of necrosis  
890 (Zombie Aqua, ZA) and apoptosis (Annexin V-APC). The upper panels show the  
891 frequency of infected cells (DsRed<sup>+</sup>) and lower panels staining with ZA and AV for cells  
892 infected with the indicated strain 48h post-infection. (C) Percentage of DsRed<sup>+</sup> cultured  
893 alveolar macrophages as quantitated from flow cytometry analysis using the gating  
894 shown in panel B. (D) Frequency of cultured alveolar macrophages that are viable (ZA<sup>-</sup>  
895 AV<sup>-</sup>), necrotic (ZA<sup>+</sup>AV<sup>-</sup>), early apoptotic (ZA<sup>-</sup>AV<sup>+</sup>) or late cell death (ZA<sup>+</sup>AV<sup>+</sup>) 48h after  
896 infection with the indicated strain expressing DsRed fluorescent protein; bystanders are  
897 defined as DsRed negative cells. Results are shown as mean ± SD for n=3 per time  
898 point and per strain. Data between cells infected with respective strains were analyzed  
899 by unpaired Student's t-test for each day and Holm multiple comparisons correction,  
900 with a 95% confidence interval. Asterisks H37Rv vs 4334 (\*p<0.05, \*\*p<0.01,  
901 \*\*\*\*p<0.0001), hashtag uninfected vs H37Rv or 4334 (#p<0.05, ##p<0.01, ###p<0.001).

902 **Figure 5. Earlier dissemination of *M. tuberculosis* strain 4334 to lymph nodes is**  
903 **associated with a greater magnitude of Ag85B-specific CD4 T cell priming. (A)**



904 Bacterial load in mediastinal lymph nodes (MdLN) of mice infected 14 days earlier with  
905 *M. tuberculosis* H37Rv or 4334. Results are shown as mean CFU fold-increase over  
906 initial inoculum. Flow cytometry assessment (**B**) and absolute quantitation (**C**) of the  
907 proliferation of CellTrace Violet-labeled adoptively transferred naïve P25TCR-  
908 Tg/CD45.1 CD4<sup>+</sup> T cells in the MDLN 10-, 14-, and 17-days post-infection with H37Rv  
909 or 4334. Percentages shown in panel B are the frequencies of adoptively transferred  
910 P25TCR-Tg CD4<sup>+</sup> T cells in which CTV was diluted as a result of cell division (CTV<sup>dilute</sup>).  
911 Results in panel C are shown as mean  $\pm$  SD, for n=4 mice per day and per strain. (**D**)  
912 Quantitation of IFN $\gamma$ <sup>+</sup> endogenous and P25TCR-Tg (as defined by congenic markers  
913 CD45.1/2) CD4<sup>+</sup> T cells in the lungs of mice infected for 14 or 17 days with H37Rv or  
914 4334. Results are shown as mean  $\pm$  SD, for n=4 mice per day and per strain. Flow  
915 cytometry analysis for these results is shown in Supplementary Figure 4B. Differences  
916 between *M. tuberculosis* strains were assessed by Student's t-test for each day and  
917 Holm multiple comparisons correction, with a 95% confidence interval and \*p<0.05, and  
918 \*\*p<0.01.

919

## 920 **Supplemental Material Legends**

### 921 **Supplementary Figure 1. Flow cytometry gating strategy for identification of lung**

922 **myeloid cell populations.** After processing lung tissue into single-cell suspensions and

923 staining, cells were flow sorted first as CD45<sup>neg</sup> (non-hematopoietic) or CD45<sup>pos</sup>. Further

924 cellular identification occurred using CD11b and CD11c to distinguish between **(1)**

925 CD11b<sup>neg/lo</sup>CD11c<sup>pos</sup> alveolar macrophages and **(2)** CD11b<sup>pos</sup>CD11c<sup>pos</sup> monocyte-

926 derived dendritic cells. Further differentiation of CD11b<sup>pos</sup> cells was done using CD11c

927 and Gr1, as **(3)** Gr1<sup>hi</sup>CD11c<sup>neg</sup> neutrophils, **(4)** Gr1<sup>int</sup>CD11c<sup>neg</sup> monocytes, and **(5)** Gr-  
928 1<sup>neg</sup>CD11c<sup>neg</sup> monocyte-derived recruited macrophages.

929 **Supplementary Figure 2. Strain-dependent spread of *M. tuberculosis* in recruited**  
930 **myeloid cells. (A)** Cells were stained and analyzed by flow cytometry for quantitation of  
931 subset and plated on 7H11 media (Figure 2). Depicted are the ratio of the average CFU  
932 over the average cell number at each time point obtained post-infection in mice infected  
933 with H37Rv, 4344, or  $\Delta$ RD1. **(B)** Relative frequency of CFU recovered from myeloid cell  
934 populations in the lungs of mice infected with *M. tuberculosis* H37Rv,  $\Delta$ RD1, or 4334  
935 after live flow sorting and plating of sorted cell fractions on 7H11 solid media. Results  
936 are shown as mean  $\pm$  SD in 1( $\Delta$ RD1), 2 (4334), and 6 (H37Rv) pooled experiments,  
937 with n=5 mice per day and per strain in each experiment.

938 **Supplementary Figure 3. *M. tuberculosis* strains exhibit differential ESX-1 activity.**  
939 H37Rv and 4334 were grown to logarithmic phase in 7H9, resuspended in Sauton's  
940 media for 1 day, and filtrate proteins were reduced, alkylated, and trypsin digested prior  
941 to run on LC-MS/MS. Spectra were searched against a combined database for H37Rv  
942 and NITR203 on UniProt, using Andromeda search algorithm and MaxQuant for  
943 quantitation. Statistical analysis done by Student t-test with Holm multiple comparisons  
944 correction, 95% confidence interval, \*p<0.05, and \*\*p<0.01.

945 **Supplementary Figure 4. *M. tuberculosis* strain 4334 induces higher levels of IFN $\gamma$**   
946 **in the lungs of mice than H37Rv after two weeks of infection. (A)** Total IFN $\gamma$  levels  
947 in the lung homogenate supernatants of mice infected with *M. tuberculosis* H37Rv or  
948 4334. Results are shown as mean  $\pm$  SD 4 experiments. Statistical significance was  
949 assessed by unpaired Student's t-test for each day and Holm multiple comparisons

950 correction, with a 95% confidence interval and \*\* $p < 0.01$  and \*\*\* $p < 0.001$ . **(B)** Flow  
951 cytometry gating strategy for the quantitation of IFN $\gamma$ -producing CD4<sup>+</sup> T cells in the  
952 lungs of mice infected with *M. tuberculosis* H37Rv or 4334 for 17 days.

953 **Supplementary Figure 5. *M. tuberculosis* strain 4334 induces a quantitatively**  
954 **greater adaptive immune response compared to H37Rv that is sustained 7 weeks**

955 **after initial infection and results in more lesions in the lung.** Mice were aerosol  
956 infected with 200-300 Colony Forming Units (CFU) of *M. tuberculosis* H37Rv or 4334

957 and harvested 7 weeks later. Lungs were processed to single cell suspensions and  
958 plated on solid media for total CFU determination **(A)**, counted for total cell number **(B)**,

959 and stained for flow cytometry analysis of cellular subsets **(D)** (see Supplementary  
960 Figure 1 and Material and Methods for gating strategy). In addition, the left lung of

961 infected mice was fixed and stained with hematoxylin and eosin (H&E). **(C)** Using Fiji  
962 open-source software, percentage of lung inflammatory infiltrate was calculated by

963 taking the total surface area of lung, subtracting contributions of airways and blood  
964 vessels. Inflammatory infiltrates were quantitated by both manual contouring and

965 automated color density contouring, with the average of these values utilized for the  
966 final percentage calculation. **(E)** Representative images of 5  $\mu$ M sections at 40x (Leica

967 SCN400 F whole-slide scanner) are shown. Results are shown as mean  $\pm$  SD of 4  
968 mice. Statistical significance was assessed by unpaired Student's t-test and Holm

969 multiple comparisons correction with a 95% confidence interval and \* $p < 0.05$ ,  
970 \*\*\* $p < 0.001$ , and \*\*\*\* $p < 0.0001$ .

971

**Figure 1**

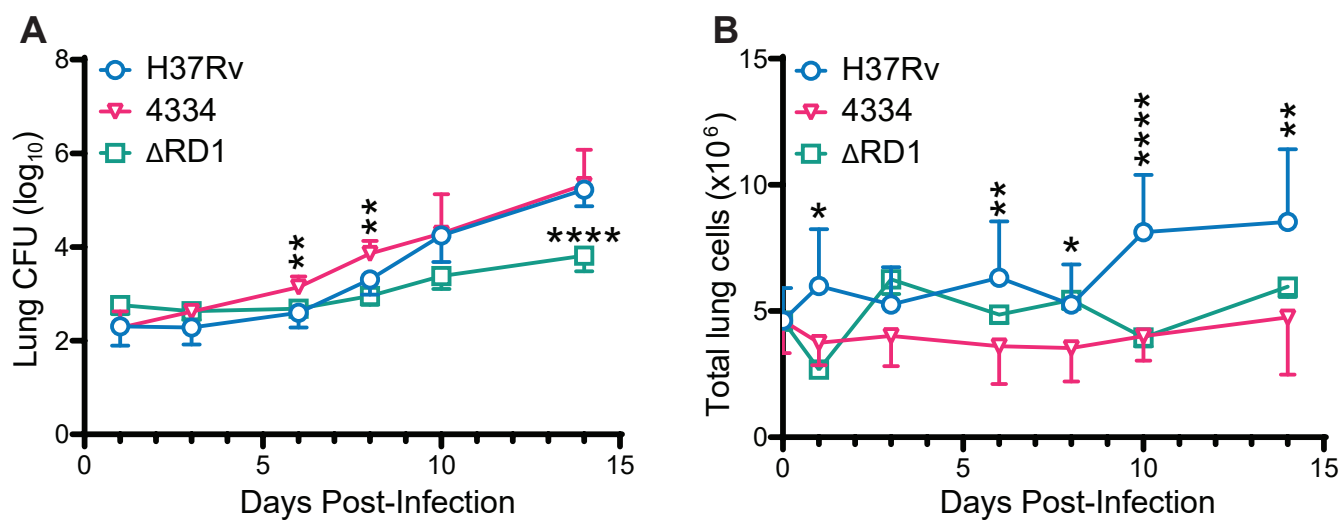

## Figure 2

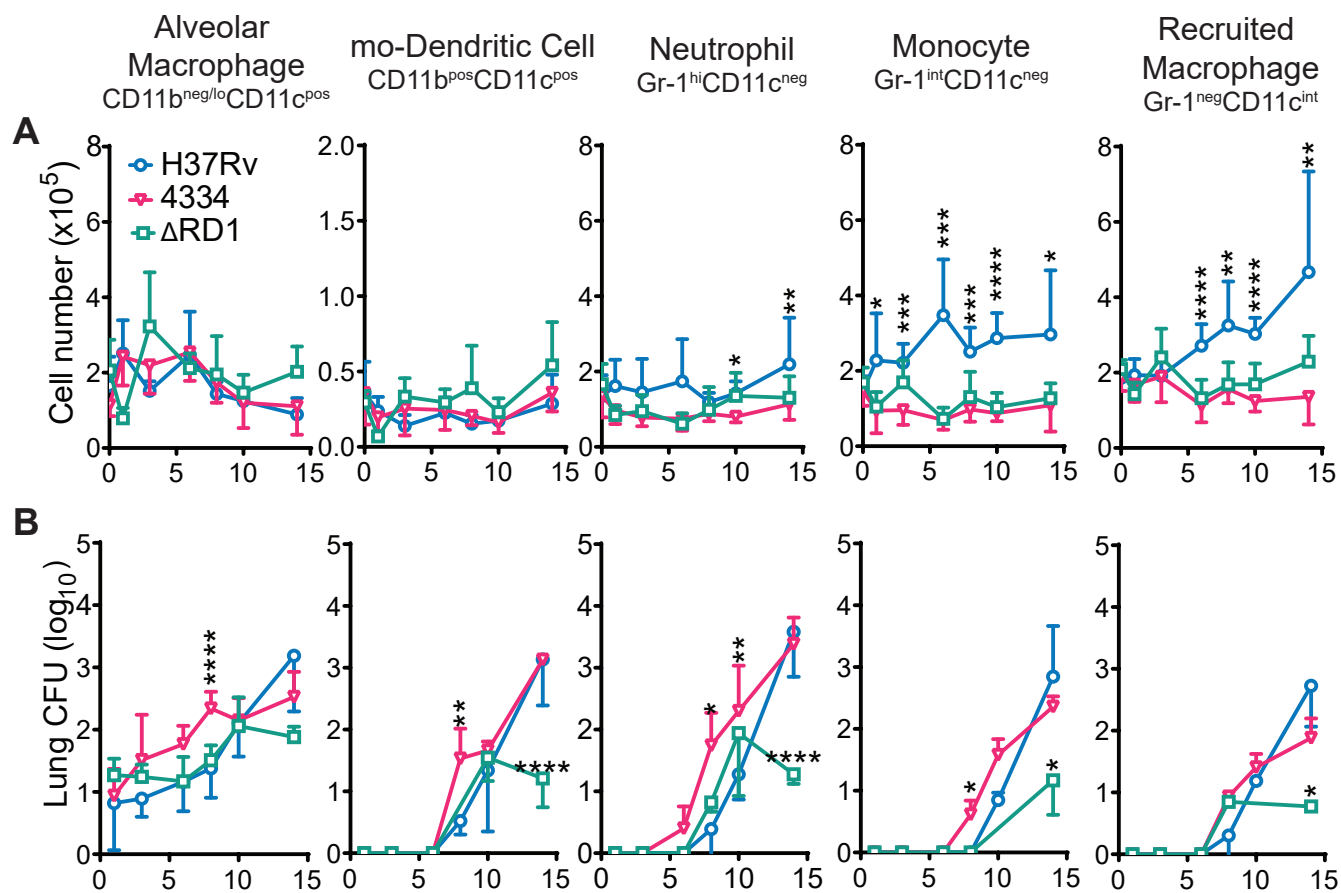

## Figure 3

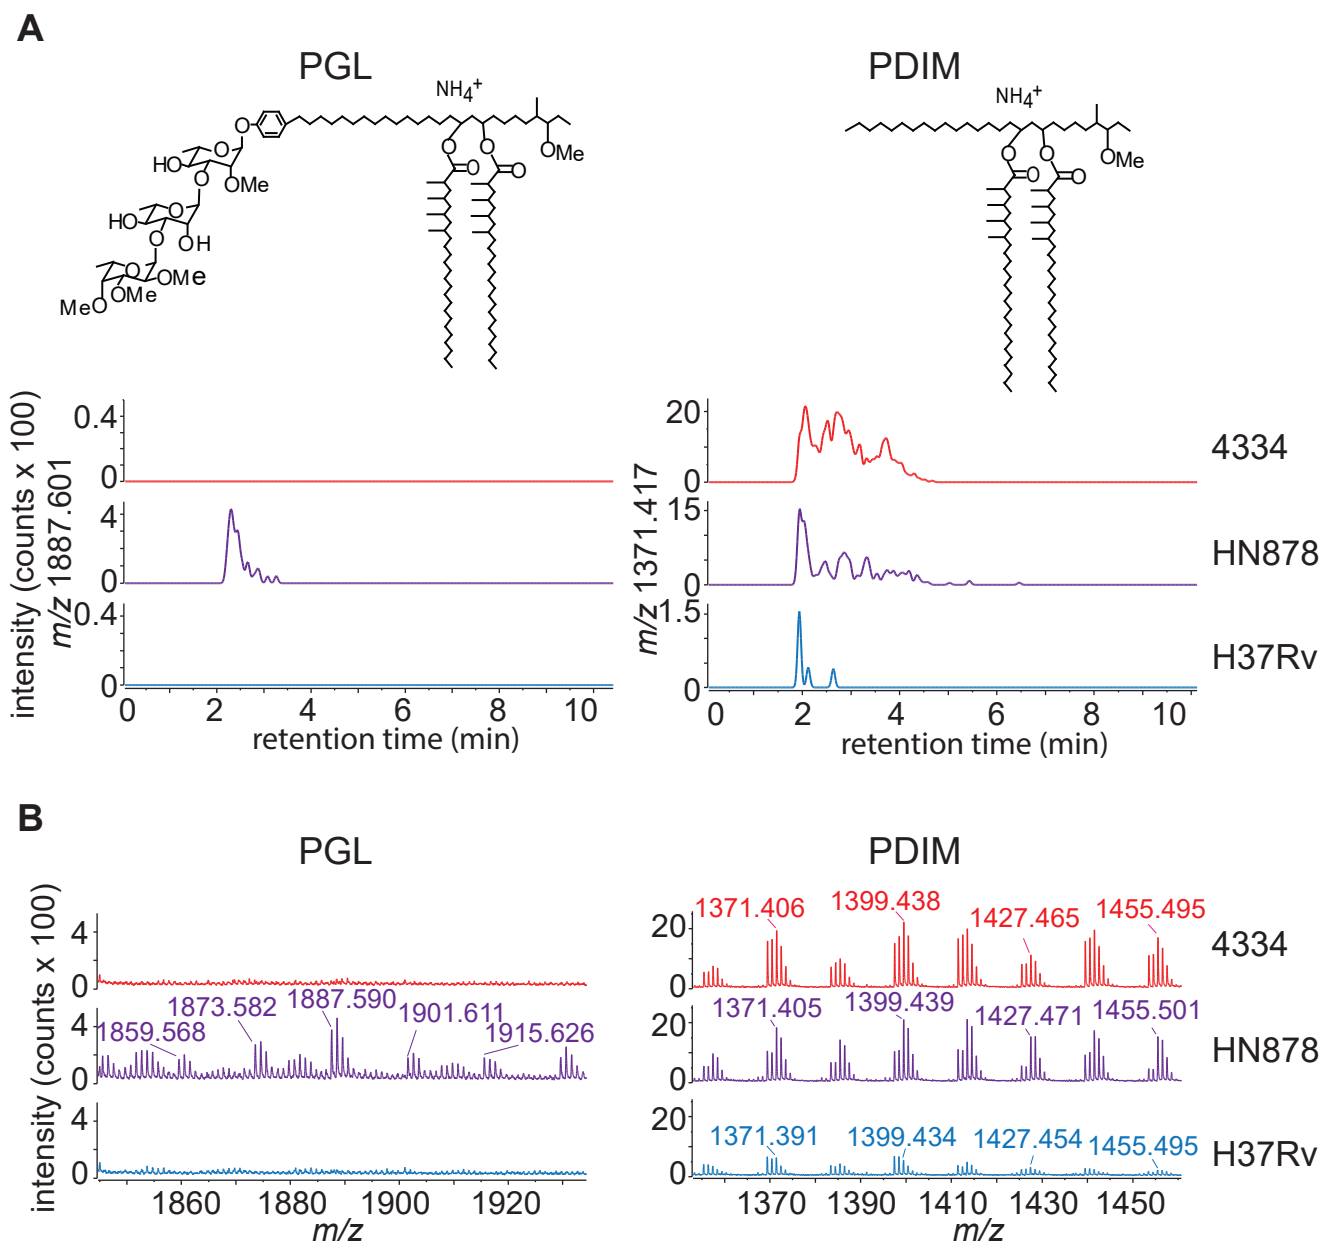

## Figure 4

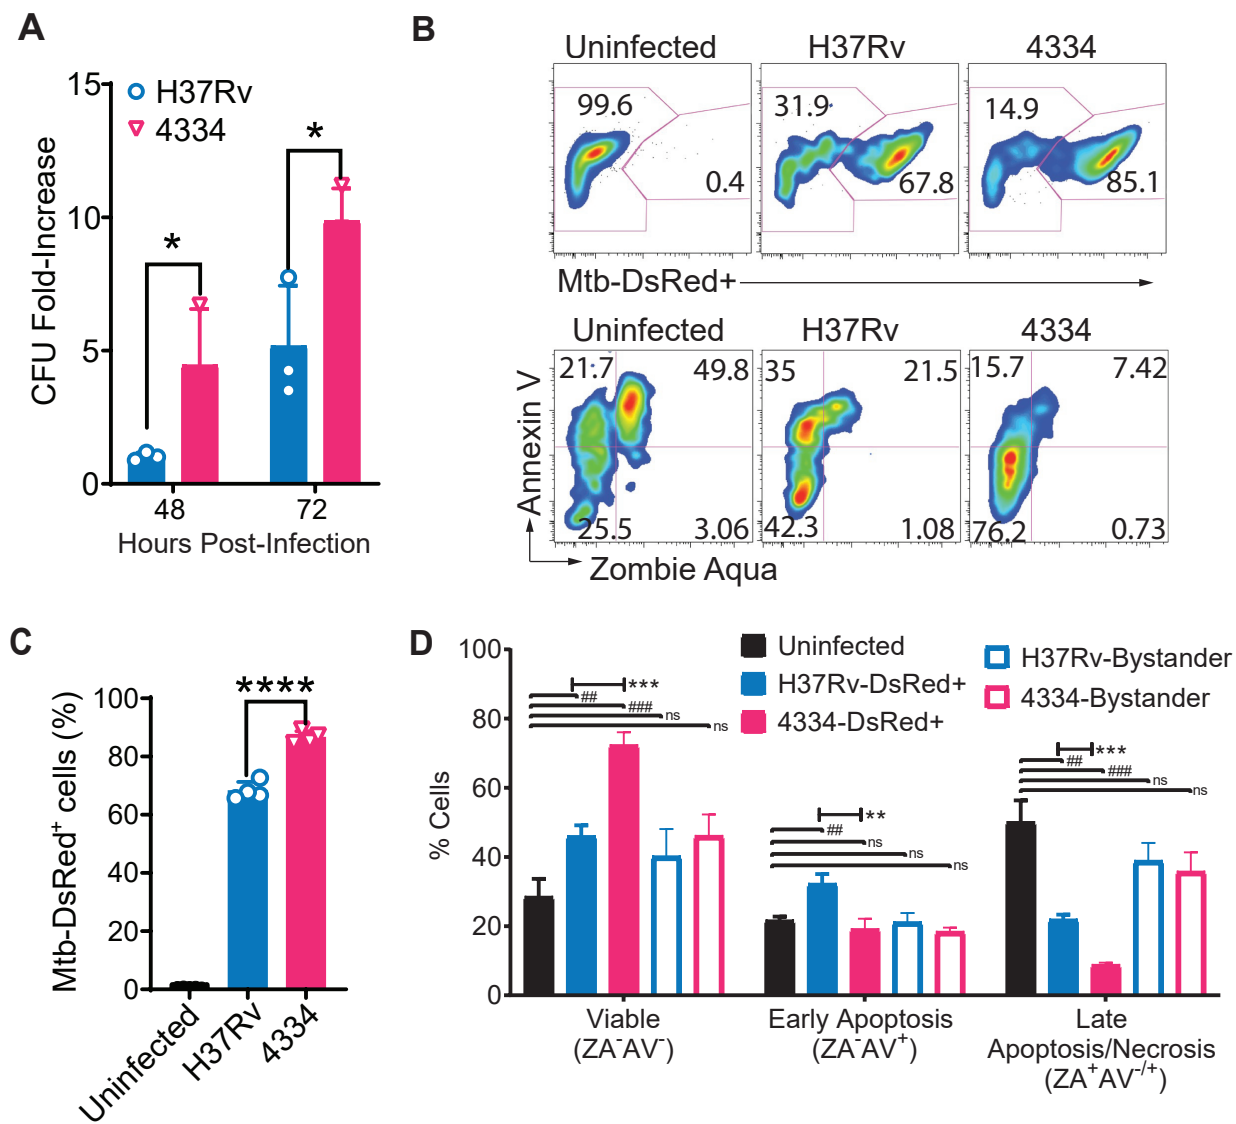

## Figure 5

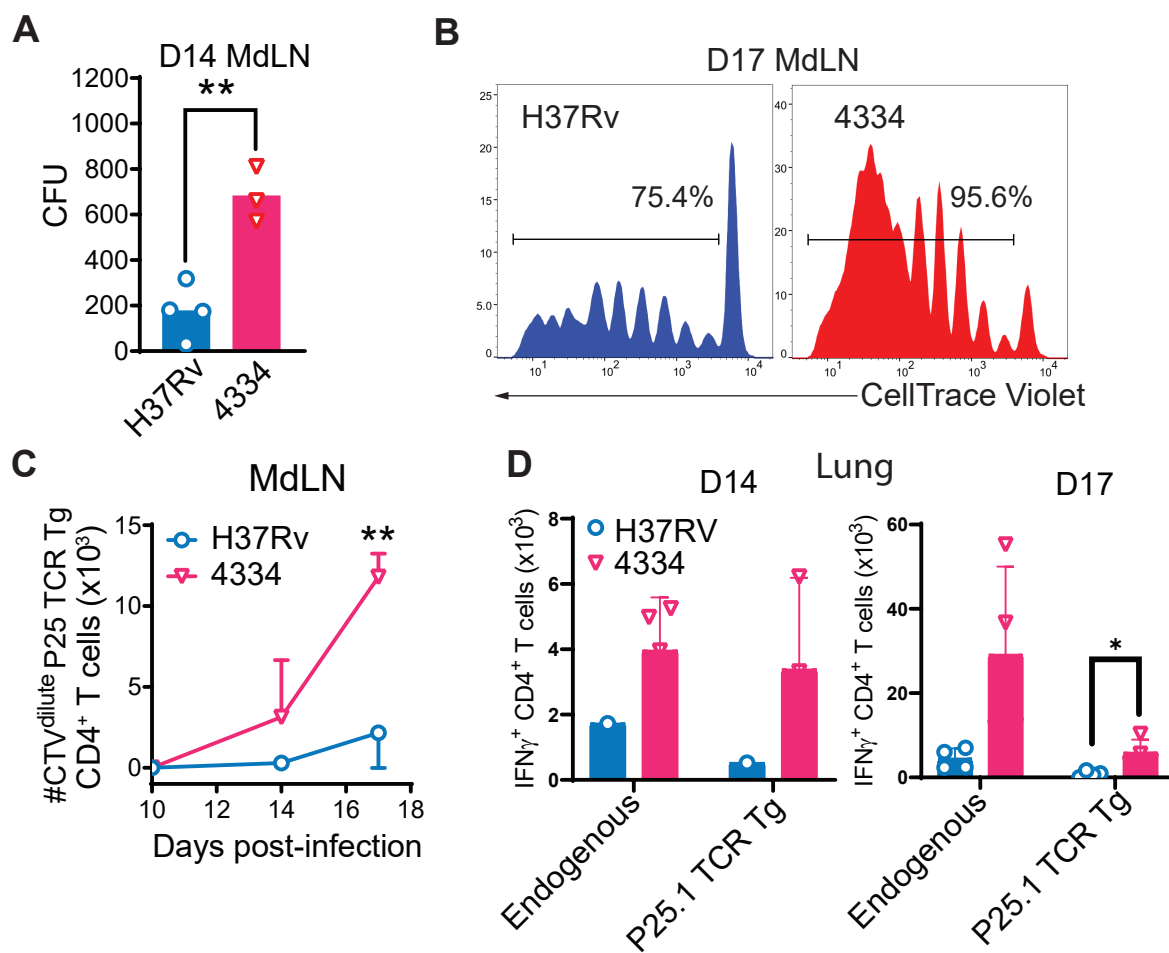

Source: http://biorxiv.org/content/10.1101/2022.05.10.491435v1.full.pdf
